# Supplementary material for: Epidemiology and Characteristics of Elizabethkingia spp. Infections in Southeast Asia
Source: MDPI journal article supplement (doi:10.3390/microorganisms10050882), 2022-04-22
Supplement: s1 [file s1]

Supplementary Table S1. Genes encoding enzymes/proteins and efflux pumps involved in Antibiotic Resistance of the *Elizabethkingia* spp.

| Antibiotic Class       | Annotation*                                                                                                          | Gene                       | <i>Elizabethkingia</i> spp.                                           | Citation     |
|------------------------|----------------------------------------------------------------------------------------------------------------------|----------------------------|-----------------------------------------------------------------------|--------------|
| <b>Aminoglycosides</b> | Aminoglycoside Acetyltransferase (AAC3-I)                                                                            | <i>aac3-i</i>              | <i>E. meningoseptica</i><br><i>E. anophelis</i><br><i>E. miricola</i> | [1]          |
|                        |                                                                                                                      | <i>ant-6</i>               | <i>E. meningoseptica</i><br><i>E. anophelis</i><br><i>E. miricola</i> | [2]          |
|                        | Aminoglycoside 6-adenylyltransferase                                                                                 | <i>ant-6-i</i>             | <i>E. anophelis</i>                                                   | [3]          |
|                        |                                                                                                                      | <i>aac6</i>                | <i>E. meningoseptica</i><br><i>E. anophelis</i>                       | [4]          |
|                        | Aac(6'), aminoglycoside-6'-N-acetyltransferase                                                                       | <i>aac6-lad</i>            | <i>E. anophelis</i>                                                   | [5]          |
| <b>Aminosalicylate</b> | Thymidylate synthase (synthetase) catalyzes the conversion of dUMP to dTMP in the nucleic acid biosynthesis pathway. | <i>thyA</i>                | <i>E. meningoseptica</i><br><i>E. anophelis</i><br><i>E. miricola</i> | [6]          |
| <b>Beta-lactamases</b> | Metallo-beta-lactamase AIM-1. Imipenemase.                                                                           | <i>bla<sub>AIM-1</sub></i> | <i>E. meningoseptica</i><br><i>E. anophelis</i>                       | [4]          |
|                        | Metallo-beta-lactamase type 2                                                                                        | <i>bla<sub>BlaB1</sub></i> | <i>E. meningoseptica</i><br><i>E. anophelis</i><br><i>E. miricola</i> | [1,4,5,7–11] |

|                                       |                              |                                                                       |          |
|---------------------------------------|------------------------------|-----------------------------------------------------------------------|----------|
|                                       | <i>bla</i> <sub>BlaB2</sub>  | <i>E. meningoseptica</i>                                              | [6,7]    |
|                                       | <i>bla</i> <sub>BlaB3</sub>  | <i>E. meningoseptica</i>                                              | [12]     |
|                                       | <i>bla</i> <sub>BlaB4</sub>  | <i>E. meningoseptica</i>                                              | [12]     |
|                                       | <i>bla</i> <sub>BlaB5</sub>  | <i>E. meningoseptica</i>                                              | [12]     |
|                                       | <i>bla</i> <sub>BlaB6</sub>  | <i>E. meningoseptica</i>                                              | [7,11]   |
|                                       | <i>bla</i> <sub>BlaB9</sub>  | <i>E. meningoseptica</i><br><i>E. anophelis</i><br><i>E. miricola</i> | [7]      |
|                                       | <i>bla</i> <sub>BlaB10</sub> | <i>E. meningoseptica</i>                                              | [7]      |
|                                       | <i>bla</i> <sub>BlaB11</sub> | <i>E. meningoseptica</i>                                              | [7,8,13] |
|                                       | <i>bla</i> <sub>BlaB12</sub> | <i>E. meningoseptica</i>                                              | [7]      |
|                                       | <i>bla</i> <sub>BlaB13</sub> | <i>E. meningoseptica</i>                                              | [6,7]    |
|                                       | <i>bla</i> <sub>BlaB14</sub> | <i>E. anophelis</i>                                                   | [9]      |
|                                       | <i>bla</i> <sub>BlaB16</sub> | <i>E. miricola</i>                                                    | [14]     |
|                                       | <i>bla</i> <sub>BlaB17</sub> | <i>E. meningoseptica</i>                                              | [12]     |
|                                       | <i>bla</i> <sub>BlaB19</sub> | <i>E. miricola</i>                                                    | [14]     |
| Extended-spectrum $\beta$ -lactamase. | <i>bla</i> <sub>SFO-1</sub>  | <i>E. meningoseptica</i><br><i>E. anophelis</i>                       | [4]      |

\*\*Annotations are based on search against the Comprehensive Antibiotic Resistance Database (CARD: <https://card.mcmaster.ca>) and Universal Protein Resource (UniProt: <https://www.uniprot.org/>)

|                                                                                                                                                          |                               |                                                                       |                  |
|----------------------------------------------------------------------------------------------------------------------------------------------------------|-------------------------------|-----------------------------------------------------------------------|------------------|
| Subclass B3 (metallo-) beta-lactamase hydrolize penicillins, cephalosporins and carbapenems / GOB beta-lactamase (subclass B3 (metallo-) beta-lactamase) | <i>bla</i> <sub>GOB-1</sub>   | <i>E. meningoseptica</i><br><i>E. anophelis</i><br><i>E. miricola</i> | [1,6–9,12,13,15] |
|                                                                                                                                                          | <i>bla</i> <sub>GOB-4</sub>   | <i>E. anophelis</i>                                                   | [3,5]            |
|                                                                                                                                                          | <i>bla</i> <sub>GOB-8</sub>   | <i>E. meningoseptica</i>                                              | [7]              |
|                                                                                                                                                          | <i>bla</i> <sub>GOB-9</sub>   | <i>E. meningoseptica</i>                                              | [7]              |
|                                                                                                                                                          | <i>bla</i> <sub>GOB-10</sub>  | <i>E. meningoseptica</i>                                              | [7]              |
|                                                                                                                                                          | <i>bla</i> <sub>GOB-11</sub>  | <i>E. meningoseptica</i>                                              | [7]              |
|                                                                                                                                                          | <i>bla</i> <sub>GOB-12</sub>  | <i>E. meningoseptica</i>                                              | [7]              |
|                                                                                                                                                          | <i>bla</i> <sub>GOB-13</sub>  | <i>E. meningoseptica</i><br><i>E. anophelis</i><br><i>E. miricola</i> | [2,7]            |
|                                                                                                                                                          | <i>bla</i> <sub>GOB-13b</sub> | <i>E. meningoseptica</i>                                              | [7]              |
|                                                                                                                                                          | <i>bla</i> <sub>GOB-14</sub>  | <i>E. meningoseptica</i>                                              | [7]              |
|                                                                                                                                                          | <i>bla</i> <sub>GOB-15</sub>  | <i>E. meningoseptica</i>                                              | [7]              |
|                                                                                                                                                          | <i>bla</i> <sub>GOB-16</sub>  | <i>E. meningoseptica</i>                                              | [7]              |
|                                                                                                                                                          | <i>bla</i> <sub>GOB-17</sub>  | <i>E. meningoseptica</i>                                              | [7]              |
|                                                                                                                                                          | <i>bla</i> <sub>GOB-18</sub>  | <i>E. meningoseptica</i>                                              | [8]              |
|                                                                                                                                                          | <i>bla</i> <sub>GOB-19</sub>  | <i>E. miricola</i>                                                    | [14]             |
| Hydrolyzed cephaloridine, cefotaxime, cephalothin, benzylpenicillin, and ceftazidime.                                                                    | <i>TLA-1</i>                  | <i>E. meningoseptica</i><br><i>E. anophelis</i><br><i>E. miricola</i> | [5,6]            |
| Confers resistance to ceftazidime, cefotaxime and cefepime                                                                                               | <i>TLA-3</i>                  | <i>E. anophelis</i>                                                   | [16]             |

Supplementary Table S2. Potential virulence associated features among *Elizabethkingia* spp. as predicted using the Virulence Factor Database (VFDB).

|                                                                                                                                                           |                              |                                                                       |                      |
|-----------------------------------------------------------------------------------------------------------------------------------------------------------|------------------------------|-----------------------------------------------------------------------|----------------------|
| Extended-spectrum $\beta$ -lactamase enzyme. Chromosomal gene (blaACME) that encodes a class A $\beta$ -lactamase conferring resistance to cephalosporins | <i>bla</i> <sub>ACME-1</sub> | <i>E. meningoseptica</i><br><i>E. anophelis</i><br><i>E. miricola</i> | [2,3,5,8,9,12,15,17] |
|                                                                                                                                                           | <i>bla</i> <sub>ACME-2</sub> | <i>E. meningoseptica</i>                                              | [8,13]               |
| ACC-3, AMPC cephalosporinase precursor protein ACC-3                                                                                                      | <i>acc-3</i>                 | <i>E. meningoseptica</i><br><i>E. anophelis</i>                       | [4]                  |
| A serine beta-lactamase with a substrate specificity for cephalosporins.                                                                                  | <i>ampC</i>                  | <i>E. meningoseptica</i>                                              | [13]                 |
| BlaIND-7, metallo-beta-lactamase IND-7                                                                                                                    | <i>IND-7</i>                 | <i>E. meningoseptica</i><br><i>E. anophelis</i>                       | [4]                  |
| Bla OCH-7, beta-lactams hydrolysis                                                                                                                        | <i>OCH-7</i>                 | <i>E. meningoseptica</i><br><i>E. anophelis</i>                       | [4]                  |
| Determinant of $\beta$ -lactam resistance                                                                                                                 | <i>CPS-1</i>                 | <i>E. anophelis</i>                                                   | [16]                 |
| A subclass B3 metallo-beta lactamase resistant to carbapenems.                                                                                            | <i>ESP-1</i>                 | <i>E. anophelis</i>                                                   | [16]                 |
|                                                                                                                                                           | <i>PEDO-1</i>                | <i>E. anophelis</i>                                                   | [16]                 |
|                                                                                                                                                           | <i>PEDO-2</i>                | <i>E. anophelis</i>                                                   | [16]                 |
|                                                                                                                                                           | <i>PEDO-3</i>                | <i>E. anophelis</i>                                                   | [16]                 |
| A subclass B3 LRA beta-lactamase conferring resistance to cephalosporin and penam                                                                         | <i>LRA-17</i>                | <i>E. anophelis</i>                                                   | [16]                 |
|                                                                                                                                                           | <i>LRA-12</i>                | <i>E. anophelis</i>                                                   | [16]                 |
| Extended-spectrum beta-lactamase                                                                                                                          | <i>TEM-113</i>               | <i>E. anophelis</i>                                                   | [16]                 |
| Extended-spectrum beta-lactamase PER-1 precursor                                                                                                          | <i>per1_1</i>                | <i>E. anophelis</i>                                                   | [10]                 |
|                                                                                                                                                           | <i>per1_2</i>                | <i>E. anophelis</i>                                                   | [10]                 |
| Plasmid-mediated SPM metallo-beta-lactamase conferring resistance to carbapenem                                                                           | <i>SPM-1</i>                 | <i>E. anophelis</i>                                                   | [16]                 |
| Beta-lactamase class-B                                                                                                                                    | <i>bla</i> <sub>LRA-12</sub> | <i>E. anophelis</i>                                                   | [16]                 |

| Chloramphenicol    | SubclassB1. Hydrolyze a variety of beta-lactams, including penicillins, cephalosporins, and carbapenems. | <i>bla</i> <sub>LRA-19</sub> | <i>E. anophelis</i>      | [16]                     |              |           |
|--------------------|----------------------------------------------------------------------------------------------------------|------------------------------|--------------------------|--------------------------|--------------|-----------|
|                    |                                                                                                          | <i>SMB-1</i>                 | <i>E. meningoseptica</i> | [1]                      |              |           |
|                    |                                                                                                          |                              | <i>E. anophelis</i>      |                          |              |           |
|                    |                                                                                                          |                              | <i>E. miricola</i>       |                          |              |           |
|                    | Chloramphenicol Acetyltransferase gene                                                                   | <i>cat</i>                   | <i>E. meningoseptica</i> | [1,18]                   |              |           |
|                    |                                                                                                          |                              | <i>E. anophelis</i>      |                          |              |           |
|                    |                                                                                                          |                              | <i>E. miricola</i>       |                          |              |           |
|                    | Plasmid-encoded variant of the cat gene                                                                  | <i>catB</i>                  | <i>E. anophelis</i>      | [3]                      |              |           |
|                    |                                                                                                          |                              | <i>catB2</i>             | <i>E. meningoseptica</i> | [6,10,16,19] |           |
|                    |                                                                                                          |                              |                          | <i>E. anophelis</i>      |              |           |
| <i>E. miricola</i> |                                                                                                          |                              |                          |                          |              |           |
| <i>catB3</i>       |                                                                                                          | <i>E. anophelis</i>          | [16]                     |                          |              |           |
| <i>catB4</i>       |                                                                                                          | <i>E. anophelis</i>          | [5]                      |                          |              |           |
| <i>catB6</i>       |                                                                                                          | <i>E. anophelis</i>          | [16]                     |                          |              |           |
| <i>catB7</i>       |                                                                                                          | <i>E. anophelis</i>          | [16]                     |                          |              |           |
| <i>catB8</i>       |                                                                                                          | <i>E. anophelis</i>          | [16]                     |                          |              |           |
| <i>catB9</i>       |                                                                                                          | <i>E. anophelis</i>          | [16]                     |                          |              |           |
| <i>catB10</i>      | <i>E. anophelis</i>                                                                                      | [16]                         |                          |                          |              |           |
| VFID               | VF_Category                                                                                              | VF_Name                      | Gene                     | Annotation               | Bacteria     | Reference |

|                    |                                                                                                                         |               |                                                                       |     |
|--------------------|-------------------------------------------------------------------------------------------------------------------------|---------------|-----------------------------------------------------------------------|-----|
|                    | Confers sulfonamide (sulfathiazole) and bicyclomycin resistance                                                         | <i>bcr</i>    | <i>E. meningoseptica</i><br><i>E. anophelis</i><br><i>E. miricola</i> | [2] |
| <b>Efflux Pump</b> | A cytoplasmic membrane component of the CeoAB-OpcM efflux pump                                                          | <i>ceoB</i>   | <i>E. meningoseptica</i><br><i>E. anophelis</i><br><i>E. miricola</i> | [6] |
|                    | MdsB is the inner membrane transporter of the multidrug and metal efflux complex MdsABC                                 | <i>mdsB</i>   | <i>E. meningoseptica</i><br><i>E. anophelis</i><br><i>E. miricola</i> | [6] |
|                    | ABC efflux pump gene, confers resistance to pleuromutilin antibiotics.                                                  | <i>taeA</i>   | <i>E. meningoseptica</i><br><i>E. anophelis</i><br><i>E. miricola</i> | [6] |
|                    | Inner membrane transporter of the AdeFGH multidrug efflux complex.                                                      | <i>adeG-1</i> | <i>E. meningoseptica</i><br><i>E. anophelis</i><br><i>E. miricola</i> | [6] |
|                    |                                                                                                                         | <i>adeG-2</i> | <i>E. meningoseptica</i><br><i>E. anophelis</i><br><i>E. miricola</i> | [6] |
|                    | Acell division regulator protein that is also a positive regulator of AcrAB only when it's expressed from a plasmid.    | <i>sdiA</i>   | <i>E. meningoseptica</i><br><i>E. anophelis</i><br><i>E. miricola</i> | [6] |
|                    | An AraC-family regulator that promotes mdtEF expression                                                                 | <i>gadW</i>   | <i>E. meningoseptica</i><br><i>E. anophelis</i><br><i>E. miricola</i> | [6] |
|                    | A response regulator that binds to the norA promoter to activate expression. ArlR must first be phosphorylated by ArlS. | <i>arlR</i>   | <i>E. meningoseptica</i><br><i>E. anophelis</i><br><i>E. miricola</i> | [6] |

|                         |                                                                                                                                                                                                                                                             |               |                                                                                                                                         |        |
|-------------------------|-------------------------------------------------------------------------------------------------------------------------------------------------------------------------------------------------------------------------------------------------------------|---------------|-----------------------------------------------------------------------------------------------------------------------------------------|--------|
|                         | A repressor for the CmeABC multidrug efflux pump, binding to the cmeABC promoter region                                                                                                                                                                     | <i>cmeR</i>   | <i>E. meningoseptica</i><br><i>E. anophelis</i><br><i>E. miricola</i>                                                                   | [6]    |
|                         | An ATP-binding cassette (ABC) transporter that exports macrolides with 14- or 15- membered lactones.                                                                                                                                                        | <i>macB</i>   | <i>E. meningoseptica</i><br><i>E. anophelis</i><br><i>E. miricola</i>                                                                   | [1]    |
|                         | Efflux pump membrane transporter BepE                                                                                                                                                                                                                       | <i>bepE_1</i> | <i>E. anophelis</i>                                                                                                                     | [10]   |
|                         |                                                                                                                                                                                                                                                             | <i>bepE_2</i> | <i>E. anophelis</i>                                                                                                                     | [10]   |
|                         |                                                                                                                                                                                                                                                             | <i>bepE_4</i> | <i>E. anophelis</i>                                                                                                                     | [10]   |
|                         |                                                                                                                                                                                                                                                             | <i>bepE_5</i> | <i>E. anophelis</i>                                                                                                                     | [10]   |
|                         |                                                                                                                                                                                                                                                             | <i>bepE_6</i> | <i>E. anophelis</i>                                                                                                                     | [10]   |
|                         |                                                                                                                                                                                                                                                             | <i>bepE_7</i> | <i>E. anophelis</i>                                                                                                                     | [10]   |
|                         | Inner membrane transporter the CmeABC multidrug efflux complex                                                                                                                                                                                              | <i>cmeB</i>   | <i>E. meningoseptica</i><br><i>E. miricola</i><br><i>E. anophelis</i><br><i>E. bruuniana</i>                                            | [20]   |
|                         | Protein subunit of AcrA-AcrB-TolC multidrug efflux complex. AcrB functions as a herterotrimer which forms the inner membrane component and is primarily responsible for substrate recognition and energy transduction by acting as a drug/proton antiporter | <i>acrB</i>   | <i>E. meningoseptica</i><br><i>E. miricola</i><br><i>E. anophelis</i><br><i>E. bruuniana</i><br><i>E. ursingii</i><br><i>E. occulta</i> | [20]   |
|                         | Subunit of the qac multidrug efflux pump                                                                                                                                                                                                                    | <i>qacH</i>   | <i>E. anophelis</i>                                                                                                                     | [16]   |
|                         | Efflux pump of the SMR family of transporters                                                                                                                                                                                                               | <i>abeS</i>   | <i>E. anophelis</i>                                                                                                                     | [6,16] |
| <b>Elfamycin</b>        | Involved in the lipid A biosynthesis                                                                                                                                                                                                                        | <i>lpxC</i>   | <i>E. anophelis</i>                                                                                                                     | [16]   |
| <b>Fluoroquinolones</b> | OqxA membrane-fusion protein. component of RND-type multidrug efflux pump that confers resistance to olaquinox                                                                                                                                              | <i>oqxA</i>   | <i>E. meningoseptica</i><br><i>E. anophelis</i>                                                                                         | [4]    |

|                      |           |                                                                                                                                                                                   |               |                                                                         |                             |
|----------------------|-----------|-----------------------------------------------------------------------------------------------------------------------------------------------------------------------------------|---------------|-------------------------------------------------------------------------|-----------------------------|
|                      |           | OqxB integral membrane protein. component of RND-type multidrug efflux pump that confers resistance to olaquinox                                                                  | <i>oqxBgb</i> | <i>E. meningoseptica</i><br><i>E. anophelis</i>                         | [4]                         |
|                      |           | A30S ribosomal protein S10 involved in the binding of tRNA to the ribosomes                                                                                                       | <i>rpsJ</i>   | <i>E. anophelis</i>                                                     | [16]                        |
|                      |           | Multidrug resistance protein MexA precursor                                                                                                                                       | <i>mexA_3</i> | <i>E. anophelis</i>                                                     | [10]                        |
|                      |           | Multidrug resistance protein MdtE precursor                                                                                                                                       | <i>mdtE_1</i> | <i>E. anophelis</i>                                                     | [10]                        |
|                      |           | Membrane fusion protein of the MexEF-OprN multidrug efflux complex                                                                                                                | <i>mexE</i>   | <i>E. meningoseptica</i><br><i>E. anophelis</i><br><i>E. miricola</i>   | [1]                         |
|                      |           | Membrane fusion protein of the efflux complex MexGHI-OpmD                                                                                                                         | <i>mexH</i>   | <i>E. meningoseptica</i><br><i>E. anophelis</i><br><i>E. miricola</i>   | [1,10]                      |
|                      |           | Lipid A export ATP-binding/permease protein MsbA                                                                                                                                  | <i>msbA</i>   | <i>E. anophelis</i>                                                     | [10]                        |
| <b>GCN5-related</b>  | <b>N-</b> | Catalyzes the transfer of an acetyl group from acetyl coenzyme A (AcCoA) to an acceptor substrate and releases both CoA and the acetylated product                                | <i>GNAT</i>   | <i>E. meningoseptica</i><br><i>E. anophelis</i><br><i>E. miricola</i>   | [1]                         |
| <b>Glycopeptides</b> |           | D-specific alpha-ketoacid dehydrogenase that synthesizes D-lactate. D-lactate is incorporated into the end of the peptidoglycan subunits, decreasing vancomycin binding affinity. | <i>vanH</i>   | <i>E. meningoseptica</i><br><i>E. anophelis</i>                         | [4]                         |
|                      |           | vanRA, also known as vanR, is a vanR variant found in the vanA gene cluster                                                                                                       | <i>vanRA</i>  | <i>E. meningoseptica</i><br><i>E. anophelis</i>                         | [4]                         |
|                      |           | vanRB is a vanR variant found in the vanB gene cluster                                                                                                                            | <i>vanRB</i>  | <i>E. meningoseptica</i><br><i>E. anophelis</i>                         | [4]                         |
|                      |           | vanRF is a vanR variant found in the vanF gene cluster                                                                                                                            | <i>vanRF</i>  | <i>E. meningoseptica</i><br><i>E. anophelis</i><br><i>E. miricola</i>   | [6]                         |
| VFG0864              | Adherence | AggR                                                                                                                                                                              | <i>aggR</i>   | Putative transcriptional activator<br>aggR (AAF-III) regulatory protein | <i>E. anophelis</i><br>[25] |

|                                            |                                                                                                                                                                                     |               |                                                                                                                                         |         |
|--------------------------------------------|-------------------------------------------------------------------------------------------------------------------------------------------------------------------------------------|---------------|-----------------------------------------------------------------------------------------------------------------------------------------|---------|
|                                            | vanXYL is a vanXY variant found in the vanL gene cluster                                                                                                                            | <i>vanXYL</i> | <i>E. meningoseptica</i><br><i>E. anophelis</i><br><i>E. miricola</i>                                                                   | [6]     |
|                                            | Serine racemase VanT. Converts L-serine to D-serine; involved in vancomycin resistance                                                                                              | <i>vanT</i>   | <i>E. meningoseptica</i><br><i>E. anophelis</i>                                                                                         | [4]     |
|                                            | vanWB, also known as vanW, is a vanW variant found in the vanB gene cluster                                                                                                         | <i>vanWB</i>  | <i>E. meningoseptica</i><br><i>E. anophelis</i>                                                                                         | [4]     |
|                                            | VanC-type vancomycin resistance DNA-binding response regulator VanR                                                                                                                 | <i>vanRc3</i> | <i>E. meningoseptica</i><br><i>E. anophelis</i>                                                                                         | [4]     |
|                                            | vanRM is a vanR variant found in the vanM gene cluster                                                                                                                              | <i>vanRM</i>  | <i>E. meningoseptica</i><br><i>E. anophelis</i>                                                                                         | [4]     |
|                                            | VanB is a D-Ala-D-Ala ligase homolog similar to VanA, and can synthesize D-Ala-D-Lac, an alternative substrate for peptidoglycan synthesis that reduces vancomycin binding affinity | <i>vanB</i>   | <i>E. meningoseptica</i>                                                                                                                | [21]    |
|                                            | vanW is a vancomycin resistance gene.                                                                                                                                               | <i>vanW</i>   | <i>E. meningoseptica</i><br><i>E. miricola</i><br><i>E. anophelis</i><br><i>E. bruuniana</i><br><i>E. ursingii</i><br><i>E. occulta</i> | [20,21] |
| <b>Isoniazid</b>                           | A catalase-peroxidase that catalyzes the activation of isoniazid                                                                                                                    | <i>katG</i>   | <i>E. meningoseptica</i><br><i>E. anophelis</i><br><i>E. miricola</i>                                                                   | [6]     |
| <b>Macrolide-lincosamide-streptogramin</b> | ABC-F subfamily protein involved in carbomycin resistance.                                                                                                                          | <i>carA</i>   | <i>E. meningoseptica</i><br><i>E. anophelis</i>                                                                                         | [4,5]   |
|                                            | lmrA is the repressor to the lmrAB and lincomycin resistant                                                                                                                         | <i>lmrA</i>   | <i>E. meningoseptica</i><br><i>E. anophelis</i>                                                                                         | [4]     |

|         |                                                                                                                                          |               |                                                                       |                             |
|---------|------------------------------------------------------------------------------------------------------------------------------------------|---------------|-----------------------------------------------------------------------|-----------------------------|
|         | Macrolide efflux pump gene located in the vicinity of <i>sul3</i> .                                                                      | <i>mefB</i>   | <i>E. meningoseptica</i><br><i>E. anophelis</i>                       | [4]                         |
|         | ABC-F subfamily protein that confers resistance to erythromycin and streptogramin B antibiotics. It is associated with plasmid DNA.      | <i>msrB1</i>  | <i>E. meningoseptica</i><br><i>E. anophelis</i><br><i>E. miricola</i> | [6]                         |
|         |                                                                                                                                          | <i>msrB2</i>  | <i>E. meningoseptica</i><br><i>E. anophelis</i><br><i>E. miricola</i> | [6]                         |
|         | ABC-F subfamily protein that confers resistance to erythromycin and streptogramin B antibiotics. It is associated with plasmid DNA.      | <i>msrE</i>   | <i>E. meningoseptica</i><br><i>E. anophelis</i>                       | [4,5]                       |
|         | ATP-binding protein. oleandomycin resistance and secretion                                                                               | <i>oleB</i>   | <i>E. meningoseptica</i><br><i>E. anophelis</i>                       | [4,5]                       |
|         | Tylosin resistance protein ( <i>tlrC</i> ) gene                                                                                          | <i>tlrC</i>   | <i>E. meningoseptica</i><br><i>E. anophelis</i>                       | [4,5]                       |
|         | Streptogramin A acetyl transferase ( <i>sat</i> ) gene. Confers resistance to class A streptogramins                                     | <i>vatF</i>   | <i>E. meningoseptica</i><br><i>E. anophelis</i>                       | [4]                         |
|         | Plasmid-mediated acetyltransferase streptogramin resistant genes.                                                                        | <i>vatA</i>   | <i>E. meningoseptica</i><br><i>E. anophelis</i><br><i>E. miricola</i> | [6]                         |
|         |                                                                                                                                          | <i>vatB</i>   | <i>E. anophelis</i>                                                   | [5]                         |
|         |                                                                                                                                          | <i>vatH</i>   | <i>E. meningoseptica</i>                                              | [6]                         |
|         | ErmF confers the MLSb phenotype.                                                                                                         | <i>ermF</i>   | <i>E. anophelis</i>                                                   | [16]                        |
|         | ABC-F subfamily protein that confers resistance to streptogramin A antibiotics and related compounds. It is associated with plasmid DNA. | <i>vgaALC</i> | <i>E. meningoseptica</i><br><i>E. anophelis</i>                       | [4]                         |
| VFG1206 | Antigen 85                                                                                                                               | <i>fbpC</i>   | Secreted antigen 85-C FbpC (85C)<br>(antigen 85 complex C) (AG58C)    | <i>E. anophelis</i><br>[25] |

|                                       |                                                                                                                                                                                                                                                                                                                                                   |             |                                                                                                                                         |              |
|---------------------------------------|---------------------------------------------------------------------------------------------------------------------------------------------------------------------------------------------------------------------------------------------------------------------------------------------------------------------------------------------------|-------------|-----------------------------------------------------------------------------------------------------------------------------------------|--------------|
|                                       | ErmB confers the MLSb phenotype. Similar to ErmC, expression of ErmB is inducible by erythromycin. The leader peptide causes attenuation of the mRNA and stabilizes the structure preventing further translation. When erythromycin is present, it binds the leader peptide causing a change in conformation allowing for the expression of ErmB. | <i>ermB</i> | <i>E. meningoseptica</i><br><i>E. anophelis</i><br><i>E. miricola</i>                                                                   | [6]          |
|                                       | Macrolide resistance, part of ABC transporter complex LolCDE.                                                                                                                                                                                                                                                                                     | <i>lolD</i> | <i>E. meningoseptica</i><br><i>E. anophelis</i><br><i>E. miricola</i>                                                                   | [2]          |
|                                       | A translocase in the <i>emrB</i> -TolC efflux protein that confers resistance to erythromycin.                                                                                                                                                                                                                                                    | <i>emrB</i> | <i>E. meningoseptica</i><br><i>E. anophelis</i><br><i>E. miricola</i>                                                                   | [2]          |
|                                       | Cfr, rRNA methylase, mediates the PhLOPSA resistance phenotype                                                                                                                                                                                                                                                                                    | <i>cfrA</i> | <i>E. meningoseptica</i><br><i>E. anophelis</i>                                                                                         | [4]          |
| <b>Multiple antibiotic resistance</b> | Multiple antibiotic resistance MAR locus                                                                                                                                                                                                                                                                                                          | <i>marA</i> | <i>E. miricola</i><br><i>E. bruuniana</i>                                                                                               | [20]         |
|                                       |                                                                                                                                                                                                                                                                                                                                                   | <i>marB</i> | <i>E. miricola</i><br><i>E. bruuniana</i>                                                                                               | [20]         |
|                                       |                                                                                                                                                                                                                                                                                                                                                   | <i>marC</i> | <i>E. ursingii</i><br><i>E. occulta</i>                                                                                                 | [20]         |
| <b>Peptide</b>                        | <i>bacA</i> gene product (BacA) recycles undecaprenyl pyrophosphate during cell wall biosynthesis which confers resistance to bacitracin.                                                                                                                                                                                                         | <i>bacA</i> | <i>E. meningoseptica</i><br><i>E. anophelis</i><br><i>E. miricola</i>                                                                   | [6]          |
| <b>Quinolone</b>                      | Encoding the DNA gyrase A subunit ( <i>gyrA</i> ). Resistance to fluoroquinolones–DNA gyrase                                                                                                                                                                                                                                                      | <i>gyrA</i> | <i>E. meningoseptica</i><br><i>E. miricola</i><br><i>E. anophelis</i><br><i>E. bruuniana</i><br><i>E. ursingii</i><br><i>E. occulta</i> | [2,20,22,23] |

|                    |                                                                                                                                                               |              |                                                                                                                                         |                           |
|--------------------|---------------------------------------------------------------------------------------------------------------------------------------------------------------|--------------|-----------------------------------------------------------------------------------------------------------------------------------------|---------------------------|
|                    | Essential for DNA supercoiling. Confers antibiotic resistance by preventing drugs from binding the beta-subunit of gyrase.                                    | <i>gyrB</i>  | <i>E. meningoseptica</i><br><i>E. miricola</i><br><i>E. anophelis</i><br><i>E. bruuniana</i><br><i>E. ursingii</i><br><i>E. occulta</i> | [2,6,20,22]               |
|                    | DNA topoisomerase IV subunit B.                                                                                                                               | <i>parC</i>  | <i>E. meningoseptica</i><br><i>E. miricola</i><br><i>E. anophelis</i><br><i>E. bruuniana</i><br><i>E. ursingii</i><br><i>E. occulta</i> | [20]                      |
|                    |                                                                                                                                                               | <i>parE</i>  | <i>E. meningoseptica</i><br><i>E. miricola</i><br><i>E. anophelis</i><br><i>E. bruuniana</i><br><i>E. ursingii</i><br><i>E. occulta</i> | [2]<br>Liang et al., 2019 |
| <b>Rifampicin</b>  | A chromosome-encoded ribosyltransferase                                                                                                                       | <i>arr-1</i> | <i>E. anophelis</i>                                                                                                                     | [16]                      |
|                    | ADP-ribosyltransferase. Resistance to rifampin.                                                                                                               | <i>arr7</i>  | <i>E. meningoseptica</i><br><i>E. anophelis</i>                                                                                         | [4]                       |
| <b>Rifamycin</b>   | RNA polymerase beta subunit. Resistance to the salinamide A, salinamide B, rifampicin, streptolydigin, CBR703, myxopyronin, and lipiarmycin due to mutations. | <i>rpoB</i>  | <i>E. meningoseptica</i><br><i>E. anophelis</i><br><i>E. miricola</i>                                                                   | [6]                       |
| <b>Sulfonamide</b> | A sulfonamide resistant dihydropteroate synthase, linked to class 1 integrons.                                                                                | <i>sul1</i>  | <i>E. meningoseptica</i>                                                                                                                | [24]                      |
|                    |                                                                                                                                                               | <i>sul2</i>  | <i>E. meningoseptica</i>                                                                                                                | [24]                      |
|                    | Dihydrofolate reductase DHFR                                                                                                                                  | <i>dhfR</i>  | <i>E. meningoseptica</i><br><i>E. anophelis</i><br><i>E. miricola</i>                                                                   | [2]                       |

|                     |                                                                                                                                    |                                |                                                                       |              |
|---------------------|------------------------------------------------------------------------------------------------------------------------------------|--------------------------------|-----------------------------------------------------------------------|--------------|
|                     | Dihydropteroate synthase, prevents sulfonamide antibiotics from inhibiting its role in folate synthesis.                           | <i>folP</i>                    | <i>E. meningoseptica</i><br><i>E. anophelis</i><br><i>E. miricola</i> | [2]          |
| <b>Tetracycline</b> | An oxytetracycline resistance ribosomal protection protein                                                                         | <i>otrA</i>                    | <i>E. meningoseptica</i><br><i>E. anophelis</i>                       | [4–6]        |
|                     | Tetracycline efflux protein gene                                                                                                   | <i>otrB</i>                    | <i>E. meningoseptica</i><br><i>E. anophelis</i>                       | [4]          |
|                     | Tetracycline efflux protein, class C                                                                                               | <i>tetA</i>                    | <i>E. anophelis</i>                                                   | [2,10]       |
|                     | A tetracycline efflux protein. It confers resistance to tetracycline, doxycycline, and minocycline, but not tigecycline.           | <i>tetB</i>                    | <i>E. meningoseptica</i><br><i>E. anophelis</i><br><i>E. miricola</i> | [6,16]       |
|                     | A flavin-dependent monooxygenase that hydroxylates position 11a of the tetraketide group thus conferring resistance to antibiotics | <i>tetX</i>                    | <i>E. meningoseptica</i><br><i>E. anophelis</i>                       | [1,4,5,9,16] |
|                     | Terminates tetracyclin's inhibitory effect on protein synthesis by ribosomal non-covalent modification                             | <i>tetO</i>                    | <i>E. meningoseptica</i><br><i>E. anophelis</i><br><i>E. miricola</i> | [6]          |
|                     | A tetracycline ribosomal protection protein found on the same operon as tetA(P), a tetracycline efflux protein                     | <i>tetB(P)</i>                 | <i>E. meningoseptica</i><br><i>E. anophelis</i><br><i>E. miricola</i> | [6]          |
| <b>Trimethoprim</b> | A chromosome-encoded dihydrofolate reductase. Determinant of diaminopyrimidine resistance                                          | <i>dfrE</i>                    | <i>E. anophelis</i>                                                   | [16]         |
|                     |                                                                                                                                    | <i>dfrA3</i>                   | <i>E. meningoseptica</i><br><i>E. anophelis</i><br><i>E. miricola</i> | [6]          |
|                     |                                                                                                                                    |                                |                                                                       |              |
|                     | An integron-encoded dihydrofolate reductase                                                                                        | <i>dfrA12</i><br><i>dfrA20</i> | <i>E. meningoseptica</i><br><i>E. anophelis</i>                       | [24]<br>[5]  |

|                   |                                                         |               |                                                              |                                                                       |             |
|-------------------|---------------------------------------------------------|---------------|--------------------------------------------------------------|-----------------------------------------------------------------------|-------------|
|                   | DHFRXVI, trimethoprim resistant dihydrofolate reductase | <i>dfr16</i>  |                                                              | <i>E. meningoseptica</i><br><i>E. anophelis</i>                       | [4]         |
|                   |                                                         |               | (mycolyl transferase 85C)<br>(fibronectin-binding protein C) |                                                                       |             |
| VFG1797           | C5a peptidase                                           | <i>scpB</i>   | Streptococcal C5a peptidase                                  | <i>E. anophelis</i>                                                   | [25]        |
| VFG1931           | Campylobacter<br>adhesion to<br>fibronectin (CadF)      | <i>cadF</i>   | Outer membrane fibronectin-<br>binding protein               | <i>E. anophelis</i><br><i>E. miricola</i>                             | [1,5,10,25] |
| VFG1354           | Choline binding<br>proteins (CBPs)                      | <i>cbpE</i>   | Choline binding protein E                                    | <i>E. anophelis</i>                                                   | [5,25]      |
| VFG001354         |                                                         | <i>pce</i>    | Choline binding protein E                                    | <i>E. meningoseptica</i><br><i>E. anophelis</i><br><i>E. miricola</i> | [1,10]      |
| *WP_0692141<br>79 | Curli fibers                                            | <i>CurEm1</i> | Hypothetical protein                                         | <i>E. meningoseptica</i>                                              | [6]         |
| *WP_0692141<br>80 |                                                         | <i>CurEm2</i> | Hypothetical protein                                         | <i>E. meningoseptica</i>                                              | [6]         |
| *WP_0692141<br>81 |                                                         | <i>CurEm3</i> | Curli assembly protein CsgF                                  | <i>E. meningoseptica</i>                                              | [6]         |
| *WP_0709044<br>86 |                                                         | <i>CurEm4</i> | Curli production assembly<br>protein CsgG                    | <i>E. meningoseptica</i>                                              | [6]         |
| VFG000457         |                                                         | <i>csgB</i>   | Minor curlin subunit precursor,<br>curli nucleator protein   | <i>E. meningoseptica</i>                                              | [1]         |

|                                     |                                  |              |                                                                        |                                                                                                                                         |                        |
|-------------------------------------|----------------------------------|--------------|------------------------------------------------------------------------|-----------------------------------------------------------------------------------------------------------------------------------------|------------------------|
| VFG000462                           |                                  | <i>csgG</i>  | Curli production<br>assembly/transport protein                         | <i>E. meningoseptica</i>                                                                                                                | [1]                    |
| VFG004125                           |                                  | <i>csgD</i>  | DNA-binding transcriptional<br>regulator                               | <i>E. meningoseptica</i><br><i>E. anophelis</i><br><i>E. miricola</i>                                                                   | [1,10]                 |
| VFG010763                           | EF-Tu                            | <i>tuf</i>   | Translation elongation factor                                          | <i>E. meningoseptica</i><br><i>E. anophelis</i><br><i>E. miricola</i><br><i>E. bruuniana</i><br><i>E. ursingii</i><br><i>E. occulta</i> | [16,20,26]             |
| VFG001855                           | Hsp60                            | <i>htpB</i>  | 60K heat shock protein                                                 | <i>E. meningoseptica</i><br><i>E. anophelis</i><br><i>E. miricola</i><br><i>E. bruuniana</i><br><i>E. ursingii</i><br><i>E. occulta</i> | [1,3,5,10,16,20,25–27] |
| VFG045346                           | Immunogenic<br>lipoprotein A     | <i>IlpA</i>  | Immunogenic lipoprotein A                                              | <i>E. meningoseptica</i><br><i>E. anophelis</i><br><i>E. miricola</i>                                                                   | [1,10,16]              |
| VFG000335V<br>FG002008<br>VFG002064 | P5 protein                       | <i>ompP5</i> | Outer membrane protein P5<br>(ompA), human factor H binding<br>protein | <i>E. anophelis</i>                                                                                                                     | [10]                   |
| VFG0101                             | Toxin-coregulated<br>pilus (TCP) | <i>toxT</i>  | TCP pilus virulence regulatory<br>protein                              | <i>E. meningoseptica</i><br><i>E. anophelis</i><br><i>E. miricola</i>                                                                   | [1,25]                 |
| VFG0872                             | Type I pili                      | <i>fimE</i>  | Type 1 fimbriae Regulatory<br>protein fimE                             | <i>E. anophelis</i>                                                                                                                     | [25]                   |
| VFG1234                             | Type IV pili                     | <i>chpD</i>  | Probable transcriptional regulator                                     | <i>E. anophelis</i>                                                                                                                     | [25]                   |

|           |                                              |                                      |              |                                                           |                                                                                                                                         |              |
|-----------|----------------------------------------------|--------------------------------------|--------------|-----------------------------------------------------------|-----------------------------------------------------------------------------------------------------------------------------------------|--------------|
| VFG1226   |                                              |                                      | <i>pilH</i>  | Pilin-like protein may involving in pseudopilus formation | <i>E. anophelis</i>                                                                                                                     | [25]         |
| VFG1214   |                                              |                                      | <i>pilR</i>  | Two-component response regulator                          | <i>E. meningoseptica</i><br><i>E. anophelis</i><br><i>E. miricola</i>                                                                   | [1,10,25,27] |
| VFG1225   |                                              |                                      | <i>pilG</i>  | Twitching motility protein                                | <i>E. miricola</i>                                                                                                                      | [1,25]       |
| SCV48     | Antimicrobial activity/Competitive advantage | Macrophage-inducible gene-5 (Mig-5)  | <i>mig-5</i> | Carbonic anhydrase chloroplast precursor                  | <i>E. meningoseptica</i>                                                                                                                | [20]         |
|           | Biofilm                                      | AdeFGH efflux pump                   | <i>adeG</i>  | Cation/multidrug efflux pump                              | <i>E. meningoseptica</i><br><i>E. anophelis</i><br><i>E. miricola</i><br><i>E. bruuniana</i><br><i>E. ursingii</i><br><i>E. occulta</i> | [20,26]      |
| VFG0122   |                                              | Alginate (Mucoid exopolysaccharide ) | <i>algD</i>  | GDP-mannose 6-dehydrogenase AlgD                          | <i>E. anophelis</i>                                                                                                                     | [25]         |
| VFG0130   |                                              |                                      | <i>algI</i>  | Alginate o-acetyltransferase AlgI                         | <i>E. anophelis</i>                                                                                                                     | [25]         |
| VFG0119   |                                              |                                      | <i>algR</i>  | Alginate biosynthesis regulatory protein AlgR             | <i>E. anophelis</i>                                                                                                                     | [25]         |
| VFG0120   |                                              |                                      | <i>algZ</i>  | Sigma factor AlgU                                         | <i>E. anophelis</i>                                                                                                                     | [25]         |
| VFG001284 |                                              | Intercellular adhesion proteins      | <i>icaR</i>  | Ica operon transcriptional regulator                      | <i>E. meningoseptica</i><br><i>E. anophelis</i><br><i>E. miricola</i>                                                                   | [1,10]       |

|         |                          |                                 |                   |                                                                         |                                                                                                                                         |              |
|---------|--------------------------|---------------------------------|-------------------|-------------------------------------------------------------------------|-----------------------------------------------------------------------------------------------------------------------------------------|--------------|
| VFG0152 |                          | Quorum sensing                  | <i>rhlR</i>       | Transcriptional regulator RhlR                                          | <i>E. anophelis</i>                                                                                                                     | [5,25]       |
|         |                          |                                 | <i>bspR2</i>      | N-acyl-homoserine lactone dependent regulatory protein                  | <i>E. anophelis</i>                                                                                                                     | [10]         |
| VFG2538 |                          |                                 | <i>pmlR/bspR1</i> | N-acylhomoserine lactone dependent regulatory protein                   | <i>E. meningoseptica</i><br><i>E. anophelis</i><br><i>E. miricola</i>                                                                   | [1,10,25]    |
| VFG1417 | Cellular metabolism      | PanC/PanD                       | <i>panC</i>       | Pantoate--beta-alanine ligase                                           | <i>E. anophelis</i>                                                                                                                     | [5,25,27]    |
| VFG1416 |                          |                                 | <i>panD</i>       | Aspartate 1-decarboxylase precursor                                     | <i>E. meningoseptica</i><br><i>E. anophelis</i><br><i>E. miricola</i><br><i>E. bruuniana</i><br><i>E. ursingii</i><br><i>E. occulta</i> | [5,20,25,27] |
| VFG1381 |                          | Isocitrate lyase                | <i>aceA</i>       | Isocitrate lyase aceA                                                   | <i>E. anophelis</i>                                                                                                                     | [5,10,27]    |
| VFG2445 | Effector delivery system | Bsa T3SS                        | <i>bapB</i>       | Acyl carrier protein                                                    | <i>E. anophelis</i>                                                                                                                     | [25]         |
| VFG2440 |                          |                                 | <i>bprB</i>       | Two-component response regulator                                        | <i>E. anophelis</i>                                                                                                                     | [25]         |
| VFG2464 |                          |                                 | <i>bsaN</i>       | AraC family transcriptional regulator, regulates basal T6SS1 expression | <i>E. anophelis</i>                                                                                                                     | [25]         |
| VFG2110 |                          | Dot/Icm T4SS secreted effectors | <i>vipD</i>       | Dot/Icm type IV secretion system effector VipD, Phospholipase A1        | <i>E. anophelis</i>                                                                                                                     | [5,25]       |

|           |                                      |               |                                                                                      |                                                                       |        |
|-----------|--------------------------------------|---------------|--------------------------------------------------------------------------------------|-----------------------------------------------------------------------|--------|
| VFG041304 |                                      | <i>lirB</i>   | Dot/Icm type IV secretion system effector                                            | <i>E. meningoseptica</i><br><i>E. anophelis</i><br><i>E. miricola</i> | [1,10] |
| VFG010763 |                                      | <i>vpdB</i>   | Dot/Icm type IV secretion system effector                                            | <i>E. meningoseptica</i><br><i>E. anophelis</i><br><i>E. miricola</i> | [1,10] |
| VFG002064 | Hcp1 secretion island I (HSI-I)      | <i>dotU1</i>  | Type VI secretion system protein DotU                                                | <i>E. meningoseptica</i><br><i>E. anophelis</i><br><i>E. miricola</i> | [1]    |
| VFG002059 |                                      | <i>tagT</i>   | Type six secretion associated protein TagT, ATP-binding component of ABC transporter | <i>E. meningoseptica</i><br><i>E. anophelis</i><br><i>E. miricola</i> | [1,10] |
| VFG2059   |                                      | <i>PA0073</i> | Type six secretion associated protein TagT, ATP-binding component of ABC transporter | <i>E. anophelis</i>                                                   | [5,25] |
| VFG2064   |                                      | <i>PA0078</i> | Type VI secretion system protein DotU                                                | <i>E. anophelis</i>                                                   | [5,25] |
| VFG045340 | Rab2 interacting conserved protein A | <i>ricA</i>   | Rab2 interacting conserved protein A                                                 | <i>E. meningoseptica</i>                                              | [1]    |
| VFG0208   | T3SS                                 | <i>exsA</i>   | Type III secretion system transcriptional regulator                                  | <i>E. anophelis</i>                                                   | [25]   |

|         |           |                              |             |                                                                                           |                                                                       |             |
|---------|-----------|------------------------------|-------------|-------------------------------------------------------------------------------------------|-----------------------------------------------------------------------|-------------|
| VFG2085 |           | T6SS                         | <i>vasH</i> | Type VI secretion system regulatory protein                                               | <i>E. meningoseptica</i><br><i>E. anophelis</i><br><i>E. miricola</i> | [1,5,25]    |
| VFG2480 |           | T6SS-1                       | <i>clpV</i> | Clp-type ATPase chaperone protein                                                         | <i>E. meningoseptica</i><br><i>E. anophelis</i><br><i>E. miricola</i> | [1,5,10,25] |
| VFG1746 |           | TTSS (chromosomally encoded) | YPO0255     | Putative two-component response regulator                                                 | <i>E. anophelis</i>                                                   | [5,25]      |
| VFG1747 |           |                              | YPO0256     | Two-component sensor/regulator                                                            | <i>E. anophelis</i>                                                   | [25]        |
| VFG1751 |           |                              | YPO0260     | Putative AraC-family regulatory protein                                                   | <i>E. anophelis</i>                                                   | [25]        |
| VFG0555 |           | TTSS (SPI-1 encode)          | <i>invC</i> | Type III secretion system ATPase Spal/InvC                                                | <i>E. anophelis</i>                                                   | [25]        |
| VFG0492 |           | TTSS (SPI-2 encode)          | <i>ssrB</i> | Secretion system regulator: transcriptional activator, homologous with degU / uvrY / bvgA | <i>E. anophelis</i>                                                   | [25]        |
| VFG1794 |           | TTSS (Ysa)                   | <i>ysrS</i> | Sensor kinase protein                                                                     | <i>E. anophelis</i>                                                   | [25]        |
|         |           | TTSS secreted effectors      | <i>exoU</i> | Type III secretion system effector ExoU, phospholipase A2 activity                        | <i>E. anophelis</i>                                                   | [10]        |
| VFG2276 | Exoenzyme | kappa-toxin                  | <i>colA</i> | Collagenase                                                                               | <i>E. meningoseptica</i><br><i>E. anophelis</i><br><i>E. miricola</i> | [1,5,25]    |

|           |          |                                         |             |                                          |                                                                       |         |
|-----------|----------|-----------------------------------------|-------------|------------------------------------------|-----------------------------------------------------------------------|---------|
| VFG2279   | Exotoxin | mu-toxin                                | <i>nagJ</i> | Hyaluronidase                            | <i>E. anophelis</i>                                                   | [25]    |
| VFG2281   |          |                                         | <i>nagL</i> | Hyaluronidase                            | <i>E. anophelis</i>                                                   | [25]    |
| VFG2284   |          | Sialidase                               | <i>nanJ</i> | Exo-alpha-sialidase                      | <i>E. anophelis</i>                                                   | [25]    |
| VFG2283   |          |                                         | <i>nanI</i> | exo-alpha-sialidase                      | <i>E. meningoseptica</i><br><i>E. miricola</i>                        | [1]     |
| VFG0674   |          | SMase                                   | <i>smcL</i> | Sphingomyelinase-c                       | <i>E. miricola</i>                                                    | [1]     |
| VFG005767 | Exotoxin | Beta-hemolysin/cytolysin                | <i>cylG</i> | 3-ketoacyl-ACP-reductase                 | <i>E. meningoseptica</i><br><i>E. anophelis</i><br><i>E. miricola</i> | [1,10]  |
| VFG1269   |          | Invasive Adenylate cyclase / haemolysin | <i>cyaB</i> | Cyclolysin secretion ATP-binding protein | <i>E. anophelis</i>                                                   | [25]    |
| VFG000843 |          | Hemolysin                               | <i>hlyD</i> | Hemolysin transport protein              | <i>E. meningoseptica</i><br><i>E. anophelis</i><br><i>E. miricola</i> | [1]     |
| VFG0841   |          |                                         | <i>hlyB</i> | Hemolysin B                              | <i>E. miricola</i><br><i>E. anophelis</i>                             | [1,25]  |
| VFG1557   |          |                                         |             |                                          |                                                                       |         |
| VFG000907 |          |                                         |             |                                          |                                                                       |         |
| VFG0073   |          | PlcA                                    | <i>plcA</i> | Phospholipase C                          | <i>E. meningoseptica</i><br><i>E. anophelis</i>                       | [25,26] |
| VFG2274   |          | Phospholipase C                         | <i>plc</i>  | Phospholipase C                          | <i>E. meningoseptica</i><br><i>E. anophelis</i>                       | [20]    |

|         |                      |                 |              |                                                                             |                                                                                      |          |
|---------|----------------------|-----------------|--------------|-----------------------------------------------------------------------------|--------------------------------------------------------------------------------------|----------|
|         |                      |                 |              |                                                                             | <i>E. miricola</i><br><i>E. bruuniana</i><br><i>E. ursingii</i><br><i>E. occulta</i> |          |
| VFG1394 |                      | Phospholipase D | <i>plcD</i>  | Phosphatidylserine/phosphatidyl<br>glycerophosphate/cardiolipin<br>synthase | <i>E. anophelis</i>                                                                  | [25]     |
|         |                      |                 | <i>Pld</i>   | Phospholipase D                                                             | <i>E. meningoseptica</i><br><i>E. anophelis</i>                                      | [26]     |
| VFG0028 | Immune<br>modulation | Brk             | <i>brkB</i>  | Serum resistance protein                                                    | <i>E. anophelis</i>                                                                  | [25]     |
|         |                      | Capsule         | <i>cap4D</i> | Tyrosine-protein kinase                                                     | <i>E. meningoseptica</i><br><i>E. anophelis</i><br><i>E. miricola</i>                | [6]      |
| VFG1300 |                      |                 | <i>cap8D</i> | Capsular polysaccharide<br>synthesis enzyme Cap8D                           | <i>E. anophelis</i>                                                                  | [5,25]   |
| VFG1301 |                      |                 | <i>cap8E</i> | Capsular polysaccharide<br>synthesis enzyme                                 | <i>E. anophelis</i>                                                                  | [1,6,25] |
| VFG1303 |                      |                 | <i>cap8G</i> | Capsular polysaccharide<br>synthesis enzyme                                 | <i>E. anophelis</i>                                                                  | [1,6]    |
|         |                      |                 | <i>capE</i>  | CapE, involved in Poly-gamma-<br>glutamate synthesis                        | <i>E. anophelis</i>                                                                  | [3]      |
|         |                      |                 | <i>capG</i>  | Capsular polysaccharide<br>synthesis enzyme CapG                            | <i>E. anophelis</i>                                                                  | [3]      |

|         |                |                                                    |                                                |      |
|---------|----------------|----------------------------------------------------|------------------------------------------------|------|
|         | <i>capL</i>    | Capsular polysaccharide synthesis enzyme           | <i>E. anophelis</i>                            | [16] |
| VFG1989 | <i>Cj1416c</i> | Sugar nucleotidyltransferase                       | <i>E. anophelis</i>                            | [1]  |
| VFG1958 | <i>Cj1430c</i> | Putative aminotransferase                          | <i>E. anophelis</i>                            | [25] |
| VFG1965 | <i>Cj1437c</i> | Aminotransferase                                   | <i>E. anophelis</i>                            | [25] |
| VFG1372 | <i>cps4H</i>   | Capsular polysaccharide biosynthesis protein Cps4H | <i>E. anophelis</i>                            | [25] |
| VFG1348 | <i>cpsE</i>    | Glycosyl transferase, group 2 family protein       | <i>E. anophelis</i>                            | [25] |
| VFG1344 | <i>cpsM</i>    | Polysaccharide biosynthesis protein CpsM(V)        | <i>E. anophelis</i>                            | [25] |
| VFG1338 | <i>neuB</i>    | N-acetyl neuramic acid synthetase                  | <i>E. anophelis</i>                            | [1]  |
|         | <i>rmlA</i>    | Glucose-1-phosphate thymidyltransferase            | <i>E. anophelis</i>                            | [16] |
|         | <i>ugd</i>     | UDP-glucose 6-dehydrogenase                        | <i>E. anophelis</i>                            | [16] |
| VFG1302 | <i>cap8F</i>   | Capsular polysaccharide synthesis enzyme Cap8F     | <i>E. meningoseptica</i><br><i>E. miricola</i> | [6]  |
| VFG1311 | <i>cap8O</i>   | Capsular polysaccharide synthesis enzyme Cap8O     | <i>E. meningoseptica</i>                       | [6]  |

|         |              |                                                    |                                                                       |             |
|---------|--------------|----------------------------------------------------|-----------------------------------------------------------------------|-------------|
| VFG1368 | <i>cps4D</i> | Capsular polysaccharide biosynthesis protein Cps4D | <i>E. meningoseptica</i><br><i>E. miricola</i>                        | [6]         |
| VFG0696 | <i>bexA</i>  | ATP-dependent polysaccharide export protein BexA   | <i>E. meningoseptica</i><br><i>E. anophelis</i><br><i>E. miricola</i> | [1,5,10,25] |
|         | <i>cap4F</i> | Capsular polysaccharide synthesis enzyme           | <i>E. meningoseptica</i><br><i>E. anophelis</i><br><i>E. miricola</i> | [1,6]       |
| VFG1306 | <i>cap8J</i> | Capsular polysaccharide synthesis enzyme           | <i>E. meningoseptica</i><br><i>E. anophelis</i><br><i>E. miricola</i> | [1,5,10,25] |
| VFG0679 | <i>capD</i>  | Capsular polysaccharide synthesis enzyme CapD      | <i>E. meningoseptica</i><br><i>E. anophelis</i><br><i>E. miricola</i> | [6,25]      |
| VFG1369 | <i>cps4E</i> | Capsular polysaccharide biosynthesis protein       | <i>E. meningoseptica</i><br><i>E. anophelis</i>                       | [1,27]      |
| VFG1352 | <i>cpsA</i>  | Undecaprenyl diphosphate synthase                  | <i>E. meningoseptica</i><br><i>E. anophelis</i><br><i>E. miricola</i> | [1]         |
| VFG1351 | <i>cpsB</i>  | Phosphatidate cytidyltransferase                   | <i>E. meningoseptica</i><br><i>E. anophelis</i><br><i>E. miricola</i> | [1]         |
| VFG1349 | <i>cpsD</i>  | Autokinase                                         | <i>E. meningoseptica</i><br><i>E. anophelis</i><br><i>E. miricola</i> | [1,25]      |

|           |           |                |                                                                 |                                                                                                                         |                      |
|-----------|-----------|----------------|-----------------------------------------------------------------|-------------------------------------------------------------------------------------------------------------------------|----------------------|
| VFG1341   |           | <i>cpsJ</i>    | Glycosyl transferase CpsJ(V)                                    | <i>E. meningoseptica</i><br><i>E. anophelis</i><br><i>E. miricola</i>                                                   | [1,10,25]            |
| VFG1342   |           | <i>cpsO</i>    | Glycosyl transferase CpsO(V)                                    | <i>E. meningoseptica</i><br><i>E. anophelis</i><br><i>E. miricola</i>                                                   | [1,5,10,25]          |
| VFG2364   |           | <i>fcl</i>     | GDP-L-fucose synthetase                                         | <i>E. meningoseptica</i><br><i>E. anophelis</i><br><i>E. miricola</i><br><i>E. ursingii</i><br><i>E. occulta</i>        | [1,5,10,16,20,25,26] |
| VFG1971   |           | <i>kpsF</i>    | D-arabinose 5-phosphate<br>isomerase                            | <i>E. meningoseptica</i><br><i>E. anophelis</i><br><i>E. miricola</i>                                                   | [1,5,10,25,27]       |
| VFG1449   |           | <i>kpsT</i>    | Capsular polysaccharide ABC<br>transporter, ATP-binding protein | <i>E. meningoseptica</i><br><i>E. anophelis</i><br><i>E. miricola</i>                                                   | [1,5,10,25]          |
|           |           | <i>pgi</i>     | Glucose-6-phosphate isomerase                                   | <i>E. meningoseptica</i> <i>E.</i><br><i>anophelis</i><br><i>E. miricola</i><br><i>E. ursingii</i><br><i>E. occulta</i> | [16,20,26]           |
| VFG001968 |           | <i>Cj1440c</i> | Sugar transferase                                               | <i>E. miricola</i>                                                                                                      | [1,25]               |
| VFG2363   | Capsule I | <i>manC</i>    | Mannose-1-phosphate<br>guanylyl transferase                     | <i>E. anophelis</i>                                                                                                     | [25]                 |

|           |                           |               |                                                                    |                                                                       |             |
|-----------|---------------------------|---------------|--------------------------------------------------------------------|-----------------------------------------------------------------------|-------------|
| VFG2550   |                           | <i>wcbP</i>   | Capsular polysaccharide biosynthesis dehydrogenase / reductase     | <i>E. anophelis</i>                                                   | [25]        |
| VFG2546   |                           | <i>wcbT</i>   | Acyl-CoA transferase                                               | <i>E. anophelis</i>                                                   | [25]        |
| VFG002563 |                           | <i>wzt2</i>   | ATP-binding ABC transporter capsular polysaccharide export protein | <i>E. meningoseptica</i><br><i>E. anophelis</i><br><i>E. miricola</i> | [1,5,10,25] |
| VFG0307   | HP-NAP                    | <i>napA</i>   | Neutrophil activating protein NapA                                 | <i>E. anophelis</i>                                                   | [25]        |
| VFG000964 | Hyaluronic acid capsule   | <i>hasC</i>   | UDP-glucose pyrophosphorylase                                      | <i>E. anophelis</i>                                                   | [1]         |
| VFG1936   | Lipooligosaccharide (LOS) | <i>Cj1135</i> | Glucosyltransferase                                                | <i>E. anophelis</i>                                                   | [1,25]      |
| VFG1939   |                           | <i>Cj1138</i> | Glycosyltransferase                                                | <i>E. anophelis</i>                                                   | [1,25]      |
| VFG013354 |                           | <i>kfiC</i>   | Lipopolysaccharide biosynthesis protein                            | <i>E. anophelis</i><br><i>E. miricola</i>                             | [1]         |
| VFG0328   |                           | <i>lic1C</i>  | ic-1 operon protein (licC)                                         | <i>E. anophelis</i>                                                   | [25]        |
| VFG013487 |                           | <i>lsgE</i>   | Glycosyltransferase                                                | <i>E. anophelis</i>                                                   | [1]         |
| VFG013248 |                           | <i>msbA</i>   | Lipid transporter ATP-binding/permease                             | <i>E. anophelis</i>                                                   | [1,10]      |
| VFG013265 |                           | <i>orfM</i>   | Deoxyribonucleotide triphosphate pyrophosphatase                   | <i>E. anophelis</i>                                                   | [1]         |

|           |                |                                                         |                                                                       |                |
|-----------|----------------|---------------------------------------------------------|-----------------------------------------------------------------------|----------------|
| VFG2027   | <i>waaE</i>    | Putative ADP-heptose synthase                           | <i>E. anophelis</i>                                                   | [25]           |
| VFG1947   | <i>waaV</i>    | Lipooligosaccharide biosynthesis<br>glycosyltransferase | <i>E. anophelis</i>                                                   | [25]           |
| VFG1937   | <i>Cj1136</i>  | Glucosyltransferase                                     | <i>E. meningoseptica</i><br><i>E. anophelis</i>                       | [1,10,25]      |
| VFG1938   | <i>Cj1137c</i> | Glycosyltransferase                                     | <i>E. meningoseptica</i><br><i>E. anophelis</i><br><i>E. miricola</i> | [6,25]         |
| VFG0079   | <i>clpC</i>    | Endopeptidase Clp ATP-binding<br>chain C                | <i>E. meningoseptica</i><br><i>E. anophelis</i><br><i>E. miricola</i> | [1,5,10,25,27] |
| VFG013465 | <i>kdsA</i>    | 2-dehydro-3-<br>deoxyphosphooctonate aldolase           | <i>E. meningoseptica</i><br><i>E. anophelis</i><br><i>E. miricola</i> | [1,10]         |
| VFG013471 | <i>lgtA</i>    | N-acetylglucosamine<br>glycosyltransferase              | <i>E. meningoseptica</i><br><i>E. anophelis</i><br><i>E. miricola</i> | [1]            |
| VFG013390 | <i>lpxA</i>    | UDP-N-acetylglucosamine<br>acyltransferase              | <i>E. meningoseptica</i><br><i>E. anophelis</i><br><i>E. miricola</i> | [1]            |
| VFG013265 | <i>orfM</i>    | Deoxyribonucleotide<br>triphosphate pyrophosphatase     | <i>E. meningoseptica</i><br><i>E. anophelis</i><br><i>E. miricola</i> | [1,10]         |
| VFG013368 | <i>rffG</i>    | dTDP-glucose 46-dehydratase                             | <i>E. meningoseptica</i><br><i>E. anophelis</i>                       | [1,10]         |

|         |                          |             |                                                                                      |                                           |                |
|---------|--------------------------|-------------|--------------------------------------------------------------------------------------|-------------------------------------------|----------------|
|         |                          |             |                                                                                      | <i>E. miricola</i>                        |                |
| VFG0037 | Lipopolysaccharide (LPS) | <i>bplB</i> | probable acetyltransferase                                                           | <i>E. anophelis</i><br><i>E. miricola</i> | [1,5,10,25,27] |
| VFG0033 |                          | <i>bplF</i> | Lipopolysaccharide biosynthesis protein                                              | <i>E. anophelis</i>                       | [25]           |
| VFG0032 |                          | <i>bplG</i> | Probable sugar transferase                                                           | <i>E. anophelis</i><br><i>E. miricola</i> | [1,5,10,16,25] |
| VFG0314 |                          | <i>gluE</i> | UDP-glucose 4-epimerase                                                              | <i>E. anophelis</i><br><i>E. miricola</i> | [1,5,10,25]    |
| VFG0313 |                          | <i>gluP</i> | Glucose/galactose transporter                                                        | <i>E. anophelis</i>                       | [25]           |
| VFG0670 |                          | <i>gtrB</i> | Bactoprenol glucosyl transferase                                                     | <i>E. anophelis</i>                       | [25,27]        |
| VFG0323 |                          | <i>lpxB</i> | Lipid-A-disaccharide synthase                                                        | <i>E. anophelis</i>                       | [25]           |
| VFG2226 |                          | <i>per</i>  | Perosamine synthetase                                                                | <i>E. anophelis</i>                       | [25]           |
| VFG0321 |                          | <i>rfbD</i> | GDP-D-mannose dehydratase                                                            | <i>E. anophelis</i>                       | [25]           |
| VFG0315 |                          | <i>rfbM</i> | Mannose-6-phosphate isomerase                                                        | <i>E. anophelis</i>                       | [1,25]         |
| VFG2230 |                          | <i>wbkC</i> | GDP-mannose 4,6-dehydratase /<br>GDP-4-amino-4,6-dideoxy-D-mannose formyltransferase | <i>E. anophelis</i>                       | [25]           |
| VFG2228 |                          | <i>wzt</i>  | O-antigen export system ATP-binding protein                                          | <i>E. anophelis</i>                       | [5,25]         |

|           |           |              |                                              |                                                                                                                  |                      |
|-----------|-----------|--------------|----------------------------------------------|------------------------------------------------------------------------------------------------------------------|----------------------|
| VFG011430 |           | <i>acpXL</i> | Acyl carrier protein                         | <i>E. meningoseptica</i><br><i>E. anophelis</i><br><i>E. miricola</i><br><i>E. ursingii</i><br><i>E. occulta</i> | [1,20]               |
| VFG0036   |           | <i>bplC</i>  | Lipopolysaccharide biosynthesis protein      | <i>E. meningoseptica</i><br><i>E. anophelis</i><br><i>E. miricola</i>                                            | [1,5,10,25,27]       |
| VFG0320   |           | <i>kdtB</i>  | Lipopolysaccharide core biosynthesis protein | <i>E. meningoseptica</i><br><i>E. anophelis</i><br><i>E. miricola</i>                                            | [1,5,10,25,27]       |
|           |           | <i>wbtI</i>  | DegT/DnrJ/EryC1/StrS family aminotransferase | <i>E. meningoseptica</i><br><i>E. anophelis</i><br><i>E. occulta</i>                                             | [20,26]              |
| VFG2361   | O-antigen | <i>galE</i>  | UDP-glucose 4-epimerase                      | <i>E. meningoseptica</i><br><i>E. anophelis</i><br><i>E. miricola</i><br><i>E. ursingii</i><br><i>E. occulta</i> | [1,5,10,16,20,25–27] |
| VFG2376   |           | <i>ddhB</i>  | CDP-glucose 4,6-dehydratase                  | <i>E. anophelis</i>                                                                                              | [25]                 |
| VFG2225   |           | <i>gmd</i>   | GDP-mannose 4,6-dehydratase                  | <i>E. anophelis</i><br><i>E. miricola</i>                                                                        | [1,5,10,16,25]       |
| VFG2374   |           | <i>prt</i>   | Paratose synthase                            | <i>E. anophelis</i><br><i>E. miricola</i>                                                                        | [1,25]               |
| VFG2366   |           | <i>rfpB</i>  | Putative glycosyltransferase                 | <i>E. anophelis</i>                                                                                              | [25]                 |

|         |          |                                         |             |                                                                                      |                                                                       |                |
|---------|----------|-----------------------------------------|-------------|--------------------------------------------------------------------------------------|-----------------------------------------------------------------------|----------------|
| VFG2373 |          |                                         | <i>wbcC</i> | Putative glycosyltransferase                                                         | <i>E. anophelis</i>                                                   | [25]           |
| VFG2368 |          |                                         | <i>wbcG</i> | Putative glycosyltransferase                                                         | <i>E. anophelis</i>                                                   | [25]           |
| VFG1443 |          | OmpA                                    | <i>ompA</i> | outer membrane protein OmpA                                                          | <i>E. anophelis</i>                                                   | [25]           |
| VFG1408 |          | PDIM<br>(Phthiocerol<br>dimycocerosate) | <i>mas</i>  | Putative multifunctional<br>mycocerosic acid synthase<br>membrane-associated MAS     | <i>E. anophelis</i>                                                   | [25]           |
| VFG0430 |          | Vi antigen                              | <i>twiC</i> | Vi polysaccharide biosynthesis<br>protein, epimerase                                 | <i>E. anophelis</i><br><br><i>E. miricola</i>                         | [1]            |
| VFG0428 |          |                                         | <i>twiE</i> | Vi polysaccharide biosynthesis<br>protein TwiE, Glycosyl<br>transferases group 1     | <i>E. anophelis</i>                                                   | [25]           |
| VFG0431 |          |                                         | <i>twiB</i> | Vi polysaccharide biosynthesis<br>protein, UDP-glucose/GDP-<br>mannose dehydrogenase | <i>E. meningoseptica</i><br><i>E. anophelis</i><br><i>E. miricola</i> | [1,5,10,25,27] |
|         | Invasion | Adherence; Porin                        | <i>DnaK</i> | Molecular chaperone                                                                  | <i>E. anophelis</i>                                                   | [16]           |
| VFG1444 |          | AslA                                    | <i>aslA</i> | Putative arylsulfatase                                                               | <i>E. anophelis</i>                                                   | [25]           |
| VFG0070 |          | p60                                     | <i>iap</i>  | P60 extracellular protein, invasion<br>associated protein Iap                        | <i>E. anophelis</i>                                                   | [25]           |
| VFG2526 | Motility | Flagella                                | <i>cheB</i> | Chemotaxis-specific<br>methyl-esterase                                               | <i>E. anophelis</i>                                                   | [25]           |

|           |                |              |                                                           |                                                                                      |                |
|-----------|----------------|--------------|-----------------------------------------------------------|--------------------------------------------------------------------------------------|----------------|
| VFG2532   |                | <i>cheY1</i> | Chemotaxis two-component response regulator CheY1         | <i>E. anophelis</i>                                                                  | [25]           |
| VFG011946 |                | <i>flgR</i>  | Sigma-54 associated transcriptional activator             | <i>E. anophelis</i>                                                                  | [10]           |
| VFG011850 |                | <i>flhG</i>  | ATP-binding protein                                       | <i>E. anophelis</i><br><i>E. miricola</i>                                            | [1]            |
| VFG043385 |                | <i>ylxH</i>  | ATP-binding protein                                       | <i>E. anophelis</i>                                                                  | [10]           |
| VFG011850 |                |              |                                                           |                                                                                      |                |
| VFG001249 |                | <i>fleR</i>  | Two-component response regulator                          | <i>E. meningoseptica</i><br><i>E. anophelis</i><br><i>E. miricola</i>                | [1,10]         |
| VFG2008   |                | <i>MotB</i>  | Flagellar motor protein                                   | <i>E. meningoseptica</i><br><i>E. anophelis</i><br><i>E. miricola</i>                | [6,25]         |
| VFG1922   |                | <i>ptmA</i>  | Putative oxidoreductase (flagellin modification)          | <i>E. anophelis</i>                                                                  | [25]           |
| VFG1243   | Polar flagella | <i>flgJ</i>  | Flagellar rod assembly protein                            | <i>E. anophelis</i>                                                                  | [25]           |
|           |                | <i>flmH</i>  | Short chain dehydrogenase/reductase family oxidoreductase | <i>E. anophelis</i><br><i>E. miricola</i><br><i>E. ursingii</i><br><i>E. occulta</i> | [16,20,26]     |
| VFG1248   |                | <i>fleQ</i>  | Transcriptional regulator                                 | <i>E. meningoseptica</i><br><i>E. anophelis</i>                                      | [1,5,10,25,27] |

|           |                              |              |                    |                                                 |                                                                       |        |
|-----------|------------------------------|--------------|--------------------|-------------------------------------------------|-----------------------------------------------------------------------|--------|
|           |                              |              | <i>E. miricola</i> |                                                 |                                                                       |        |
| VFG1237   | Nutritional/Metabolic factor | Aerobactin   | <i>FlgD</i>        | Flagellar hook capping protein                  | <i>E. meningoseptica</i><br><i>E. anophelis</i><br><i>E. miricola</i> | [6]    |
| VFG0937   |                              |              | <i>iucD</i>        | L-lysine 6-monooxygenase IucD                   | <i>E. anophelis</i>                                                   | [25]   |
| VFG1085   |                              |              | <i>iutA</i>        | Ferric aerobactin receptor precursor IutA       | <i>E. anophelis</i>                                                   | [25]   |
| VFG0917   |                              | Chu          | <i>chuA</i>        | Outer membrane heme/hemoglobin receptor ChuA    | <i>E. anophelis</i>                                                   | [25]   |
| VFG0916   |                              |              | <i>chuS</i>        | Heme oxygenase ChuS                             | <i>E. anophelis</i>                                                   | [25]   |
| VFG0922   |                              |              | <i>chuU</i>        | Heme permease protein ChuU                      | <i>E. anophelis</i>                                                   | [25]   |
| VFG044172 |                              |              | <i>chuV</i>        | ATP-binding hydrophilic protein                 | <i>E. meningoseptica</i><br><i>E. anophelis</i><br><i>E. miricola</i> | [1]    |
| VFG0934   |                              | Enterobactin | <i>entA</i>        | 2,3-dihydro-2,3-dihydroxybenzoate dehydrogenase | <i>E. anophelis</i>                                                   | [25]   |
| VFG000923 |                              |              | <i>fepA</i>        | Ferrienterobactin outer membrane transporter    | <i>E. anophelis</i><br><i>E. miricola</i>                             | [1,25] |
| VFG0925   |                              |              | <i>fepC</i>        | Ferrienterobactin ABC transporter ATPase        | <i>E. anophelis</i>                                                   | [25]   |

|         |                          |                 |                                                |                                                                                                                  |                      |
|---------|--------------------------|-----------------|------------------------------------------------|------------------------------------------------------------------------------------------------------------------|----------------------|
| VFG1859 | Fe utilization protein A | <i>feoB</i>     | Fe(2+) transporter permease subunit FeoB       | <i>E. anophelis</i>                                                                                              | [25]                 |
| VFG0344 | HitABC                   | <i>hitC</i>     | iron(III) ABC transporter, ATP-binding protein | <i>E. anophelis</i>                                                                                              | [25]                 |
| VFG0358 | Yersiniabactin           | <i>fyuA/psn</i> | pesticin/yersiniabactin receptor protein       | <i>E. anophelis</i>                                                                                              | [25]                 |
| VFG0574 | MgtBC                    | <i>mgtB</i>     | Mg2+ transport protein                         | <i>E. meningoseptica</i><br><i>E. anophelis</i><br><i>E. miricola</i><br><i>E. ursingii</i><br><i>E. occulta</i> | [1,5,10,16,20,25–27] |
| VFG0575 | MgtC                     | <i>mgtC</i>     | Possible Mg2+ transport P-type ATPase C        | <i>E. meningoseptica</i><br><i>E. anophelis</i><br><i>E. miricola</i>                                            | [1,5,10,25,27]       |
| VFG9570 | Mycobacti                | <i>irtA</i>     | Iron-regulated transporter                     | <i>E. meningoseptica</i><br><i>E. anophelis</i><br><i>E. miricola</i>                                            | [1,10]               |
| VFG0168 | Pyochelin                | <i>pchD</i>     | Pyochelin biosynthesis protein PchD            | <i>E. anophelis</i>                                                                                              | [25]                 |
| VFG1267 | Pyochelin                | <i>pchH</i>     | ABC transporter ATP-binding protein            | <i>E. anophelis</i>                                                                                              | [25]                 |
| VFG1266 | Pyochelin                | <i>pchI</i>     | ABC transporter ATP-binding protein            | <i>E. anophelis</i>                                                                                              | [25]                 |

|           |                                 |                                    |              |                                         |                                                                       |                |
|-----------|---------------------------------|------------------------------------|--------------|-----------------------------------------|-----------------------------------------------------------------------|----------------|
| VFG0165   |                                 | Pyochelin                          | <i>pchF</i>  | Pyochelin synthetase                    | <i>E. meningoseptica</i><br><i>E. anophelis</i><br><i>E. miricola</i> | [1,10]         |
| VFG0167   |                                 | Pyochelin                          | <i>pchR</i>  | Transcriptional regulator               | <i>E. meningoseptica</i><br><i>E. anophelis</i><br><i>E. miricola</i> | [1,5,25]       |
| VFG0160   |                                 | Pyoverdine                         | <i>pvdE</i>  | Pyoverdine biosynthesis protein         | <i>E. meningoseptica</i><br><i>E. anophelis</i><br><i>E. miricola</i> | [1,5,10,25]    |
| VFG1650   |                                 | Salmochelin                        | <i>iroN</i>  | Salmochelin receptor IroN               | <i>E. anophelis</i>                                                   | [25]           |
| VFG1653   |                                 | Salmochelin                        | <i>iroC</i>  | ATP binding cassette transporter        | <i>E. meningoseptica</i><br><i>E. anophelis</i><br><i>E. miricola</i> | [1,25]         |
| VFG0366   |                                 | Yersiniabactin                     | <i>ybtQ</i>  | Inner membrane ABC-transporter          | <i>E. meningoseptica</i><br><i>E. anophelis</i><br><i>E. miricola</i> | [1,10,25,27]   |
| VFG0364   |                                 | Yersiniabactin                     | <i>ybtA</i>  | putative AraC type regulator            | <i>E. anophelis</i>                                                   | [25]           |
| VFG0365   |                                 | Yersiniabactin                     | <i>ybtP</i>  | Putative inner membrane ABC-transporter | <i>E. anophelis</i>                                                   | [25]           |
| VFG001864 | Post-translational modification | Macrophage infectivity potentiator | <i>mip</i>   | Macrophage infectivity potentiator      | <i>E. meningoseptica</i><br><i>E. anophelis</i><br><i>E. miricola</i> | [1,5,10,25,27] |
| VF0449    |                                 | PrsA2                              | <i>prsA2</i> | Post translocation chaperone            | <i>E. meningoseptica</i><br><i>E. anophelis</i>                       | [1]            |

|           |                 |                                             |             |                                                                                           |                                                                       |                   |
|-----------|-----------------|---------------------------------------------|-------------|-------------------------------------------------------------------------------------------|-----------------------------------------------------------------------|-------------------|
| VFC0315   |                 |                                             |             |                                                                                           | <i>E. miricola</i>                                                    |                   |
| VFG2044   | Regulation      | BvgAS                                       | <i>bvgA</i> | Virulence factors transcription regulator                                                 | <i>E. anophelis</i>                                                   | [25]              |
| VFG0478   |                 | Ferric uptake regulator                     | <i>fur</i>  | Transcriptional repressor of iron-responsive genes (Fur family) (ferric uptake regulator) | <i>E. anophelis</i>                                                   | [25]              |
| VFG1406   |                 | Iron-dependent regulator                    | <i>ideR</i> | Iron-dependent repressor and activator IdeR                                               | <i>E. anophelis</i>                                                   | [25]              |
| VFG1889   |                 | LetA/S                                      | <i>letA</i> | Response regulator GacA                                                                   | <i>E. anophelis</i>                                                   | [25]              |
| VFG1390   |                 | Mycobacterial persistence regulator (MprAB) | <i>mprA</i> | Two component response transcriptional regulatory protein MprA                            | <i>E. anophelis</i>                                                   | [25]              |
| VFG1887   |                 | RelA                                        | <i>relA</i> | GTP pyrophosphokinase ((p)ppGpp synthetase I) stringent stress response RelA              | <i>E. anophelis</i>                                                   | [25]              |
| VFG1866   |                 | RpoS                                        | <i>rpoS</i> | RNA polymerase sigma factor RpoS                                                          | <i>E. anophelis</i>                                                   | [5,25,27]         |
| VFG1412   |                 | SigH                                        | <i>sigH</i> | RNA polymerase sigma-E factor                                                             | <i>E. anophelis</i>                                                   | [25]              |
| VFG1404   | Stress survival | AhpC                                        | <i>ahpC</i> | Putative alkylhydroperoxidase C                                                           | <i>E. anophelis</i>                                                   | [25]              |
| VFG000077 |                 | clpP                                        | <i>clpP</i> | ATP-dependent Clp protease proteolytic subunit                                            | <i>E. meningoseptica</i><br><i>E. anophelis</i><br><i>E. miricola</i> | [1,5,10,16,25,27] |

|         |        |           |             |                            |                                                                                                                                         |                      |
|---------|--------|-----------|-------------|----------------------------|-----------------------------------------------------------------------------------------------------------------------------------------|----------------------|
| VFG0080 |        | ClpE      | <i>clpE</i> | Fimbrial chaperone protein | <i>E. anophelis</i>                                                                                                                     | [5,10,25]            |
| VFG1867 |        | SodB      | <i>sodB</i> | Superoxide dismutase       | <i>E. meningoseptica</i><br><i>E. anophelis</i><br><i>E. miricola</i>                                                                   | [1,5,10,25,27]       |
| VFG1861 |        | KatAB     | <i>katA</i> | Catalase/(hydro)peroxidase | <i>E. meningoseptica</i><br><i>E. anophelis</i><br><i>E. miricola</i><br><i>E. bruuniana</i><br><i>E. ursingii</i><br><i>E. occulta</i> | [1,5,10,16,20,25–27] |
| VFG1396 |        | KatG      | <i>katG</i> | Catalase/peroxidase HPI    | <i>E. meningoseptica</i><br><i>E. anophelis</i><br><i>E. miricola</i><br><i>E. bruuniana</i><br><i>E. ursingii</i><br><i>E. occulta</i> | [10,16,20,26]        |
| VFG0274 |        | Urease    | <i>ureG</i> | Urease accessory protein   | <i>E. meningoseptica</i><br><i>E. anophelis</i><br><i>E. miricola</i><br><i>E. ursingii</i><br><i>E. occulta</i>                        | [1,20,26]            |
| VFG0269 |        | Urease    | <i>ureA</i> | Urease alpha subunit       | <i>E. miricola</i>                                                                                                                      | [1]                  |
| VFG0272 |        | Urease    | <i>ureE</i> | Urease accessory protein   | <i>E. miricola</i>                                                                                                                      | [1]                  |
| VFG0869 | Others | Dispersin | <i>aatC</i> | ATP-binding protein AatC   | <i>E. anophelis</i>                                                                                                                     | [5,25,27]            |

|           |                                                  |               |                                                                            |                                                                                                                                         |                   |
|-----------|--------------------------------------------------|---------------|----------------------------------------------------------------------------|-----------------------------------------------------------------------------------------------------------------------------------------|-------------------|
| VFG1381   | Isocitrate lyase                                 | <i>icl</i>    | Isocitrate lyase Icl (isocitrase)<br>(isocitratase)                        | <i>E. meningoseptica</i><br><i>E. anophelis</i><br><i>E. miricola</i><br><i>E. bruuniana</i><br><i>E. ursingii</i><br><i>E. occulta</i> | [1,5,10,16,20,26] |
| VFG1731   | c3610                                            | <i>c3610</i>  | Unknown                                                                    | <i>E. anophelis</i>                                                                                                                     | [25]              |
|           | Desferrioxamine                                  | <i>dfoA</i>   | L-lysine 6-monooxygenase<br>involved in desferrioxamine<br>biosynthesis    | <i>E. anophelis</i>                                                                                                                     | [16]              |
|           |                                                  | <i>dfoC</i>   | Desferrioxamine siderophore<br>biosynthesis protein dfoC                   | <i>E. anophelis</i>                                                                                                                     | [16]              |
|           |                                                  | <i>dfoJ</i>   | Putative decarboxylase involved<br>in desferrioxamine biosynthesis         | <i>E. anophelis</i>                                                                                                                     | [16]              |
|           | Heme<br>biosynthesis                             | <i>hemL</i>   | Glutamate-1-semialdehyde<br>aminotransferase                               | <i>E. meningoseptica</i><br><i>E. anophelis</i><br><i>E. miricola</i><br><i>E. ursingii</i><br><i>E. occulta</i>                        | [16,20,26]        |
| VFG1411   | Unknown                                          | <i>leuD</i>   | 3-isopropylmalate dehydratase<br>small subunit                             | <i>E. anophelis</i>                                                                                                                     | [5,25]            |
| VFG037100 | Methionine<br>sulphoxide<br>reductase<br>(MsrAB) | <i>msrB_2</i> | Trifunctional<br>thioredoxin/methionine sulfoxide<br>reductase A/B protein | <i>E. meningoseptica</i><br><i>E. anophelis</i><br><i>E. miricola</i>                                                                   | [1,10,16]         |

|         |                                   |              |                                                                           |                                                                                                                                         |            |
|---------|-----------------------------------|--------------|---------------------------------------------------------------------------|-----------------------------------------------------------------------------------------------------------------------------------------|------------|
|         | N-linked protein glycosylation    | <i>pglC</i>  | General glycosylation pathway protein                                     | <i>E. anophelis</i>                                                                                                                     | [16]       |
|         | <i>P. syringae</i> TTSS effectors | <i>hopJ1</i> | Type III effector HopJ1                                                   | <i>E. miricola</i><br><i>E. ursingii</i><br><i>E. occulta</i>                                                                           | [20]       |
| VFG1389 | PrrA/B                            | <i>prpA</i>  | Transcriptional regulatory protein PrrA                                   | <i>E. anophelis</i>                                                                                                                     | [25]       |
|         | Streptococcal enolase             | <i>eno</i>   | Phosphopyruvate hydratase                                                 | <i>E. meningoseptica</i><br><i>E. anophelis</i><br><i>E. miricola</i><br><i>E. bruuniana</i><br><i>E. ursingii</i><br><i>E. occulta</i> | [16,20,26] |
| VFG1539 | Hek                               | <i>hek</i>   | Adhesin/virulence factor Hek                                              | <i>E. anophelis</i>                                                                                                                     | [25]       |
| VFG1398 |                                   | <i>trpD</i>  | Anthranilate phosphoribosyltransferase                                    | <i>E. anophelis</i>                                                                                                                     | [25]       |
| VFG1068 | Unknown                           | <i>orf52</i> | Hypothetical protein                                                      | <i>E. anophelis</i>                                                                                                                     | [5]        |
| VFG1706 | Unknown                           | <i>c3575</i> | Transposase insF for insertion sequence IS3A/B/C/D/E/fA                   | <i>E. anophelis</i>                                                                                                                     | [25]       |
| VFG1722 | Unknown                           | <i>c3601</i> | Hypothetical protein                                                      | <i>E. anophelis</i>                                                                                                                     | [25]       |
| VFG0562 | Unknown                           | <i>mutS</i>  | methyl-directed mismatch repair, recognize exocyclic adducts of guanosine | <i>E. anophelis</i>                                                                                                                     | [25]       |
| VFG1473 | Unknown                           | <i>ORF22</i> | hypothetical protein                                                      | <i>E. anophelis</i>                                                                                                                     | [25]       |

|         |         |                |                                                                                   |                     |      |
|---------|---------|----------------|-----------------------------------------------------------------------------------|---------------------|------|
| VFG0491 | Unknown | <i>orf242</i>  | putative regulatory proteins,<br>merR family                                      | <i>E. anophelis</i> | [25] |
| VFG1050 | Unknown | <i>orf34</i>   | Unkown                                                                            | <i>E. anophelis</i> | [25] |
| VFG1054 | Unknown | <i>orf38</i>   | Hypothetical protein                                                              | <i>E. anophelis</i> | [25] |
| VFG0483 | Unknown | <i>orf408</i>  | putative regulatory protein, deoR<br>family                                       | <i>E. anophelis</i> | [25] |
| VFG1580 | Unknown | <i>orf46</i>   | Hypothetical protein                                                              | <i>E. anophelis</i> | [25] |
| VFG1583 | Unknown | <i>orf49</i>   | hypothetical protein                                                              | <i>E. anophelis</i> | [25] |
| VFG1456 | Unknown | ORF5           | hypothetical protein                                                              | <i>E. anophelis</i> | [25] |
| VFG1074 | Unknown | <i>orf58</i>   | IS1328 transposase                                                                | <i>E. anophelis</i> | [25] |
| VFG1512 | Unknown | ORF61          | putative reverse transcriptase                                                    | <i>E. anophelis</i> | [25] |
| VFG0489 | Unknown | <i>orf7</i>    | Hypothetical protein                                                              | <i>E. anophelis</i> | [25] |
| VFG0479 | Unknown | <i>pykF</i>    | pyruvate kinase I (formerly F),<br>fructose stimulated                            | <i>E. anophelis</i> | [25] |
| VFG0585 | Unknown | <i>soxS</i>    | transcriptional activator of<br>superoxide response regulon<br>(AraC/XylS family) | <i>E. anophelis</i> | [25] |
| VFG0564 | Unknown | <i>sugR</i>    | ATP binding protein                                                               | <i>E. anophelis</i> | [25] |
| VFG1036 | Unknown | <i>tetA(B)</i> | tetracycline resistance protein<br>TetA(B)                                        | <i>E. anophelis</i> | [25] |

|         |         |               |                                                                              |                     |        |
|---------|---------|---------------|------------------------------------------------------------------------------|---------------------|--------|
| VFG1037 | Unknown | <i>tetC</i>   | putative transcriptional regulator<br>TetC                                   | <i>E. anophelis</i> | [25]   |
| VFG1038 | Unknown | <i>tetD</i>   | putative transcriptional regulator<br>TetD                                   | <i>E. anophelis</i> | [25]   |
| VFG1030 | Unknown | <i>tnpR</i>   | resolvase TnpR                                                               | <i>E. anophelis</i> | [25]   |
| VFG0487 | Unknown | <i>ttrS</i>   | Tetrathionate reductase complex:<br>sensory transduction histidine<br>kinase | <i>E. anophelis</i> | [25]   |
| VFG1100 | Unknown | <i>VC1767</i> | conserved hypothetical protein                                               | <i>E. anophelis</i> | [25]   |
| VFG0660 | Unknown | <i>yeeS</i>   | intergenic-region protein                                                    | <i>E. anophelis</i> | [25]   |
| VFG0082 | Unknown | <i>aldA</i>   | Aldehyde dehydrogenase                                                       | <i>E. anophelis</i> | [5,25] |
| VFG0087 | Unknown | <i>tagD</i>   | tagD protein                                                                 | <i>E. anophelis</i> | [5,25] |
| VFG0576 | Unknown | <i>ssb</i>    | ssDNA-binding protein controls<br>activity of RecBCD nuclease                | <i>E. anophelis</i> | [5,25] |
| VFG0596 | Unknown | <i>copR</i>   | Copper resistance; transcriptional<br>regulatory protein                     | <i>E. anophelis</i> | [5,25] |
| VFG1028 | Unknown | <i>intI1</i>  | Tn21 integrase IntI1                                                         | <i>E. anophelis</i> | [5,25] |
| VFG1105 | Unknown | <i>VC1772</i> | Hypothetical protein                                                         | <i>E. anophelis</i> | [25]   |
| VFG1115 | Unknown | <i>nanK</i>   | ROK family protein                                                           | <i>E. anophelis</i> | [25]   |

|         |         |              |                                                            |                                                                                                                  |           |
|---------|---------|--------------|------------------------------------------------------------|------------------------------------------------------------------------------------------------------------------|-----------|
| VFG1511 | Unknown | <i>ORF60</i> | Putative integrase                                         | <i>E. anophelis</i>                                                                                              | [5,25]    |
| VFG1584 | Unknown | <i>orf50</i> | Hypothetical protein                                       | <i>E. anophelis</i>                                                                                              | [5,25]    |
| VFG1587 | Unknown | <i>orf53</i> | Hypothetical protein                                       | <i>E. anophelis</i>                                                                                              | [5,25]    |
| VFG1668 | Unknown | <i>orf45</i> | Putative lysil-tRNA synthetase<br>LysU                     | <i>E. anophelis</i>                                                                                              | [5,25]    |
| VFG1633 | Unknwon | <i>mchF</i>  | Microcin transport protein MchF                            | <i>E. anophelis</i>                                                                                              | [25]      |
| VFG1051 | Unknwon | <i>ORF35</i> | Putative CS12 fimbrial-like<br>upstream regulatory protein | <i>E. anophelis</i>                                                                                              | [25]      |
| VFG0270 | Urease  | <i>ureB</i>  | Urease beta subunit UreB, urea<br>amidohydrolase           | <i>E. meningoseptica</i><br><i>E. anophelis</i><br><i>E. miricola</i><br><i>E. ursingii</i><br><i>E. occulta</i> | [1,20,26] |

\*Accession number is provided instead.

1. Breurec, S.; Criscuolo, A.; Diancourt, L.; Rendueles, O.; Vandenbogaert, M.; Passet, V.; Caro, V.; Rocha, E.P.; Touchon, M.; Brisse, S. Genomic epidemiology and global diversity of the emerging bacterial pathogen *Elizabethkingia anophelis*. *Scientific reports* **2016**, *6*, 1-12, doi:10.1038/srep30379.
2. Chen, S.; Soehnlen, M.; Downes, F.; Walker, E. Insights from the draft genome into the pathogenicity of a clinical isolate of *Elizabethkingia meningoseptica* Em3. *Standards in genomic sciences* **2017**, *12*, 56.
3. Amladi, A.; Jacob, J.J.; Anandan, S.; Veeraraghavan, B. Draft genome sequence of carbapenem-resistant *Elizabethkingia anophelis* strain BP8467 clinical isolate from India. *Journal of global antimicrobial resistance* **2020**, *21*, 200-202, doi:10.1016/j.jgar.2020.04.003.
4. Teo, J.; Tan, S.Y.-Y.; Liu, Y.; Tay, M.; Ding, Y.; Li, Y.; Kjelleberg, S.; Givskov, M.; TP Lin, R.; Yang, L. Comparative Genomic Analysis of Malaria Mosquito Vector-Associated Novel Pathogen *Elizabethkingia anophelis*. *Genome biology and evolution* **2014**, *6*, 1158-1165, doi:10.1093/gbe/evu094.

5. Li, Y.; Liu, Y.; Chew, S.C.; Tay, M.; Salido, M.M.S.; Teo, J.; Lauro, F.M.; Givskov, M.; Yang, L. Complete genome sequence and transcriptomic analysis of the novel pathogen *Elizabethkingia anophelis* in response to oxidative stress. *Genome biology and evolution* **2015**, *7*, 1676-1685, doi:10.1093/gbe/evv101.
6. Chen, S.; Soehnen, M.; Blom, J.; Terrapon, N.; Henrissat, B.; Walker, E.D. Comparative genomic analyses reveal diverse virulence factors and antimicrobial resistance mechanisms in clinical *Elizabethkingia meningoseptica* strains. *PloS one* **2019**, *14*, e0222648, doi:10.1371/journal.pone.0222648.
7. Yum, J.H.; Lee, E.Y.; Hur, S.-H.; Jeong, S.H.; Lee, H.; Yong, D.; Chong, Y.; Lee, E.-W.; Nordmann, P.; Lee, K. Genetic diversity of chromosomal metallo- $\beta$ -lactamase genes in clinical isolates of *Elizabethkingia meningoseptica* from Korea. *The Journal of Microbiology* **2010**, *48*, 358-364, doi:10.1007/s12275-010-9308-5.
8. González, L.J.; Vila, A.J. Carbapenem resistance in *Elizabethkingia meningoseptica* is mediated by metallo- $\beta$ -lactamase BlaB. *Antimicrobial agents and chemotherapy* **2012**, *56*, 1686-1692.
9. Lau, S.K.; Wu, A.K.; Teng, J.L.; Tse, H.; Curreem, S.O.; Tsui, S.K.; Huang, Y.; Chen, J.H.; Lee, R.A.; Yuen, K.-Y. Evidence for *Elizabethkingia anophelis* transmission from mother to infant, Hong Kong. *Emerging infectious diseases* **2015**, *21*, 232, doi:10.3201/eid2102.140623.
10. Perrin, A.; Larssonneur, E.; Nicholson, A.C.; Edwards, D.J.; Gundlach, K.M.; Whitney, A.M.; Gulvik, C.A.; Bell, M.E.; Rendueles, O.; Cury, J. Evolutionary dynamics and genomic features of the *Elizabethkingia anophelis* 2015 to 2016 Wisconsin outbreak strain. *Nature communications* **2017**, *8*, 1-12, doi:10.1038/ncomms15483.
11. Bellais, S.; Aubert, D.; Naas, T.; Nordmann, P. Molecular and biochemical heterogeneity of class B carbapenem-hydrolyzing  $\beta$ -lactamases in *Chryseobacterium meningosepticum*. *Antimicrobial agents and chemotherapy* **2000**, *44*, 1878-1886, doi:10.1128/AAC.44.7.1878-1886.2000.
12. Matyi, S.A.; Hoyt, P.R.; Hosoyama, A.; Yamazoe, A.; Fujita, N.; Gustafson, J.E. Draft genome sequences of *Elizabethkingia meningoseptica*. *Genome announcements* **2013**, *1*, e00444-00413, doi:10.1128/genomeA.00444-13.
13. Sun, G.; Wang, L.; Bao, C.; Li, T.; Ma, L.; Chen, L. Complete genome sequence of *Elizabethkingia meningoseptica*, isolated from a T-cell non-Hodgkin's lymphoma patient. *Genome announcements* **2015**, *3*, e00673-00615, doi:10.1128/genomeA.00673-15.
14. Hu, R.; Zhang, Q.; Gu, Z. Whole-genome analysis of the potentially zoonotic *Elizabethkingia miricola* FL160902 with two new chromosomal MBL gene variants. *Journal of Antimicrobial Chemotherapy* **2020**, *75*, 526-530, doi:10.1093/jac/dkz480.
15. Steinberg, J.P.; Burd, E.M. Other gram-negative and gram-variable bacilli. *Principles and practice of infectious diseases* **2010**, *2*, 2751-2768.
16. Wang, M.; Gao, H.; Lin, N.; Zhang, Y.; Huang, N.; Walker, E.D.; Ming, D.; Chen, S.; Hu, S. The antibiotic resistance and pathogenicity of a multidrug-resistant *Elizabethkingia anophelis* isolate. *MicrobiologyOpen* **2019**, *8*, e804, doi:10.1002/mbo3.804.
17. Rossolini, G.M.; Franceschini, N.; Lauretti, L.; Caravelli, B.; Riccio, M.L.; Galleni, M.; Frère, J.-M.; Amicosante, G. Cloning of a *Chryseobacterium* (Flavobacterium) *meningosepticum* chromosomal gene (blaA CME) encoding an extended-spectrum class A  $\beta$ -

lactamase related to the Bacteroides cephalosporinases and the VEB-1 and PER  $\beta$ -lactamases. *Antimicrobial Agents and Chemotherapy* **1999**, *43*, 2193-2199, doi:10.1128/AAC.43.9.2193.

18. Ghafoori, S.M.; Robles, A.M.; Arada, A.M.; Shirmast, P.; Dranow, D.M.; Mayclin, S.J.; Lorimer, D.D.; Myler, P.J.; Edwards, T.E.; Kuhn, M.L. Structural characterization of a Type B chloramphenicol acetyltransferase from the emerging pathogen *Elizabethkingia anophelis* NUHP1. *Scientific reports* **2021**, *11*, 1-10, doi:10.1038/s41598-021-88672-z.
19. Chen, C.; Chen, Y.; Wang, F. Risk factors of healthcare-associated *Elizabethkingia meningoseptica* infections in Taiwan medical center. *International Journal of Antimicrobial Agents* **2017**, *50*, S141-S141.
20. Liang, C.-Y.; Yang, C.-H.; Lai, C.-H.; Huang, Y.-H.; Lin, J.-N. Comparative Genomics of 86 Whole-Genome Sequences in the Six Species of the *Elizabethkingia* Genus Reveals Intraspecific and Interspecific Divergence. *Scientific reports* **2019**, *9*, 1-11, doi:10.1038/s41598-019-55795-3.
21. Naidenov, B.; Lim, A.; Willyerd, K.; Torres, N.J.; Johnson, W.L.; Hwang, H.J.; Hoyt, P.; Gustafson, J.E.; Chen, C. Pan-genomic and polymorphic driven prediction of antibiotic resistance in *Elizabethkingia*. *Frontiers in microbiology* **2019**, *10*, 1446, doi:10.3389/fmicb.2019.01446.
22. Lin, J.-N.; Lai, C.-H.; Yang, C.-H.; Huang, Y.-H.; Lin, H.-H. Clinical manifestations, molecular characteristics, antimicrobial susceptibility patterns and contributions of target gene mutation to fluoroquinolone resistance in *Elizabethkingia anophelis*. *Journal of Antimicrobial Chemotherapy* **2018**, *73*, 2497-2502, doi:10.1093/jac/dky197.
23. Johnson, W.L.; Ramachandran, A.; Torres, N.J.; Nicholson, A.C.; Whitney, A.M.; Bell, M.; Villarma, A.; Humrighouse, B.W.; Sheth, M.; Dowd, S.E. The draft genomes of *Elizabethkingia anophelis* of equine origin are genetically similar to three isolates from human clinical specimens. *PloS one* **2018**, *13*, e0200731, doi:10.1371/journal.pone.0200731.
24. Jiang, X.; Wang, D.; Wang, Y.; Yan, H.; Shi, L.; Zhou, L. Occurrence of antimicrobial resistance genes *sul* and *dfrA* 12 in hospital environmental isolates of *Elizabethkingia meningoseptica*. *World Journal of Microbiology and Biotechnology* **2012**, *28*, 3097-3102.
25. Teo, J.; Tan, S.Y.-Y.; Liu, Y.; Tay, M.; Ding, Y.; Li, Y.; Kjelleberg, S.; Givskov, M.; Lin, R.T.; Yang, L. Comparative genomic analysis of malaria mosquito vector-associated novel pathogen *Elizabethkingia anophelis*. *Genome biology and evolution* **2014**, *6*, 1158-1165.
26. Yang, C.; Liu, Z.; Yu, S.; Ye, K.; Li, X.; Shen, D. Comparison of Whole-Genome Sequences for Three Species of the *Elizabethkingia* Genus. **2020**.
27. Lin, J.-N.; Lai, C.-H.; Yang, C.-H.; Huang, Y.-H.; Lin, H.-H. Genomic features, phylogenetic relationships, and comparative genomics of *Elizabethkingia anophelis* strain EM361-97 isolated in Taiwan. *Scientific reports* **2017**, *7*, 1-8, doi:10.1038/s41598-017-14841-8.
